# Supplementary material for: Global distribution of surface soil organic carbon in urban greenspaces
Source: PubMed Central journal article supplement (PMC11258340; doi:10.1038/s41467-024-44887-y), 2024-01-27
Supplement: 41467_2024_44887_MOESM1_ESM.pdf [file 41467_2024_44887_MOESM1_ESM.pdf]

## **Supplementary information**

### **Global distribution of surface soil organic carbon in urban greenspaces**

Hongbo Guo<sup>1,2</sup>, Enzai Du<sup>1,2\*</sup>, César Terrer<sup>3</sup>, Robert B. Jackson<sup>4,5</sup>

<sup>1</sup>State Key Laboratory of Earth Surface Processes and Resource Ecology, Faculty of Geographical Science, Beijing Normal University, Beijing 100875, China.

<sup>2</sup>School of Natural Resources, Faculty of Geographical Science, Beijing Normal University, Beijing 100875, China.

<sup>3</sup>Department of Civil and Environmental Engineering, Massachusetts Institute of Technology, Cambridge, MA 02139-4307, USA.

<sup>4</sup>Department of Earth System Science, Stanford University, Stanford, CA, USA.

<sup>5</sup>Woods Institute for the Environment and Precourt Institute for Energy, Stanford University, Stanford, CA, USA.

\* Correspondence to Enzai Du, Email: enzaidu@bnu.edu.cn, Tel: +86-10-58808085

#### **This file includes:**

Supplementary Figures 1 to 14, Supplementary Tables 1 to 5, and Supplementary References.

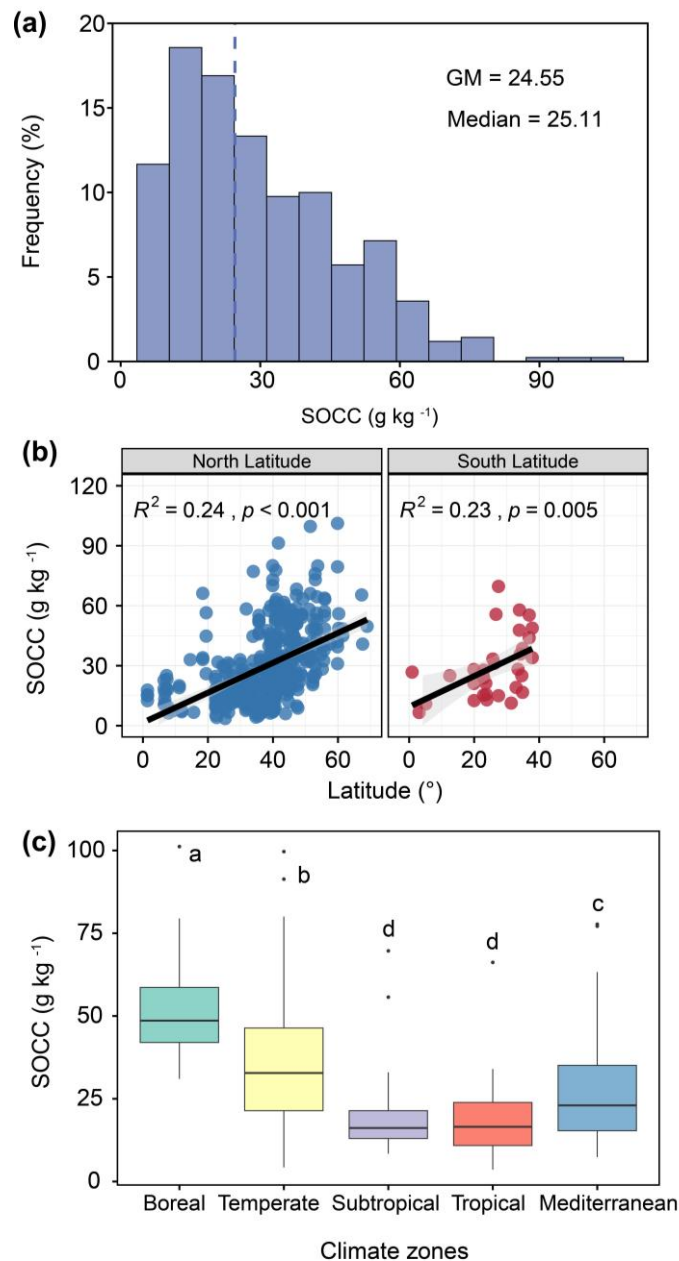

**Supplementary Fig. 1. Spatial variation of observed surface SOC concentration (SOCC, g kg<sup>-1</sup>) (0-20 cm) across global urban greenspaces in SOC-U database. a,** The frequency distribution of observed SOCC. **b,** Changes in observed SOCC with latitude for the northern and southern hemisphere. The shaded area represents the 95% confidence interval. **c,** Boxplots showing SOCC in urban greenspaces for different climate zones. Upper and lower bars represent 95th and 5th percentiles. Different letters indicate significant differences for the SOCC among climate zones (LSD test,  $P < 0.05$ ). Source data are provided as a Source Data file.

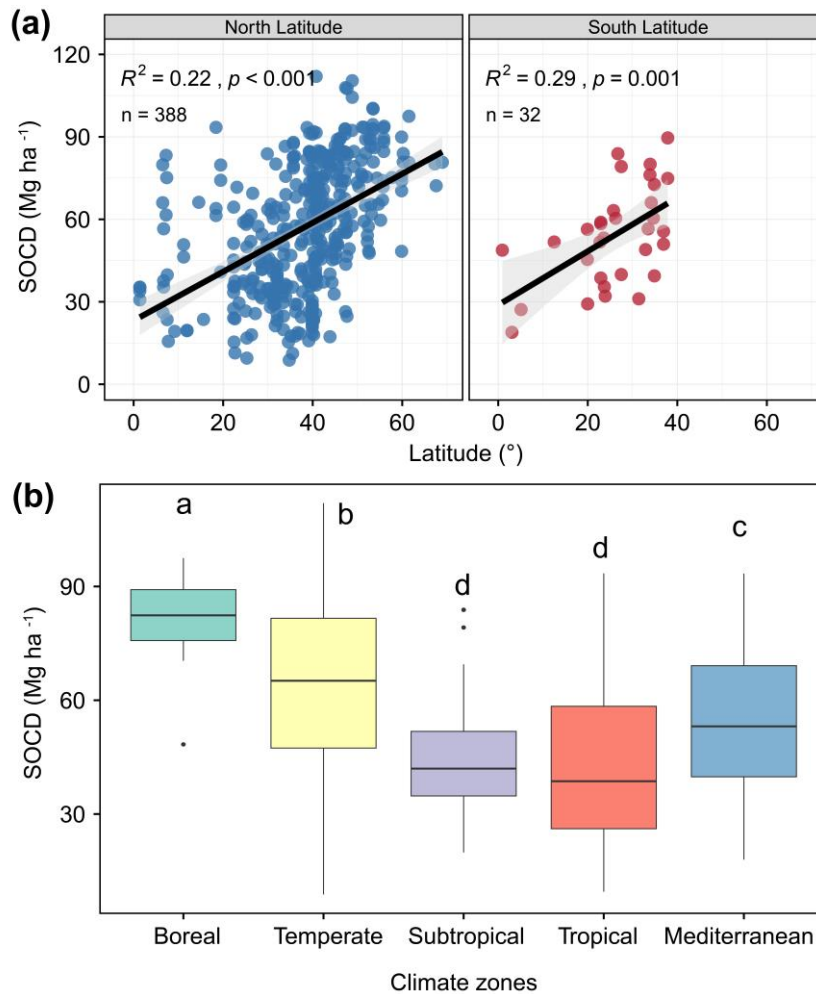

**Supplementary Fig. 2. Spatial variation of observed surface SOC density (SOC D, Mg C ha<sup>-1</sup>) (0-20 cm) across global urban greenspaces in SOC-U database. a,** Changes in observed SOC D with latitude for the northern and southern hemisphere. The shaded area represents the 95% confidence interval. **b,** Boxplots showing SOC D in urban greenspaces for different climate zones. Upper and lower bars represent 95th and 5th percentiles. Different letters indicate significant differences for the SOC D among climate zones (LSD test,  $P < 0.05$ ). Source data are provided as a Source Data file.

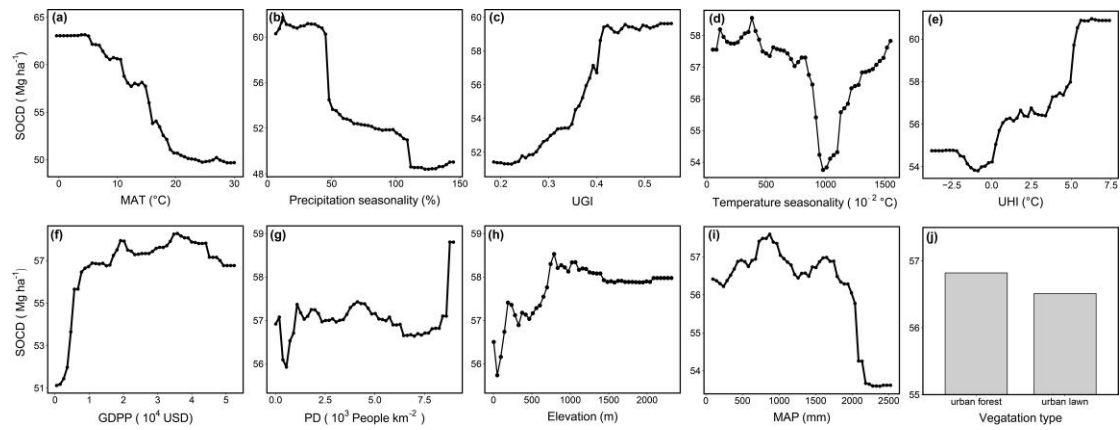

**Supplementary Fig. 3. Partial dependence plots indicating the dependence of soil organic carbon density (SOCD) on ten predictors (MAT, MAP, temperature seasonality, precipitation seasonality, UGI, UHI, GDPP, PD, elevation, and vegetation type).** Abbreviations: UGI, urban greenness index; MAT, mean annual air temperature; MAP, mean annual precipitation; GDPP, GDP per capita; PD, population density; UHI, urban heat island index. Source data are provided as a Source Data file.

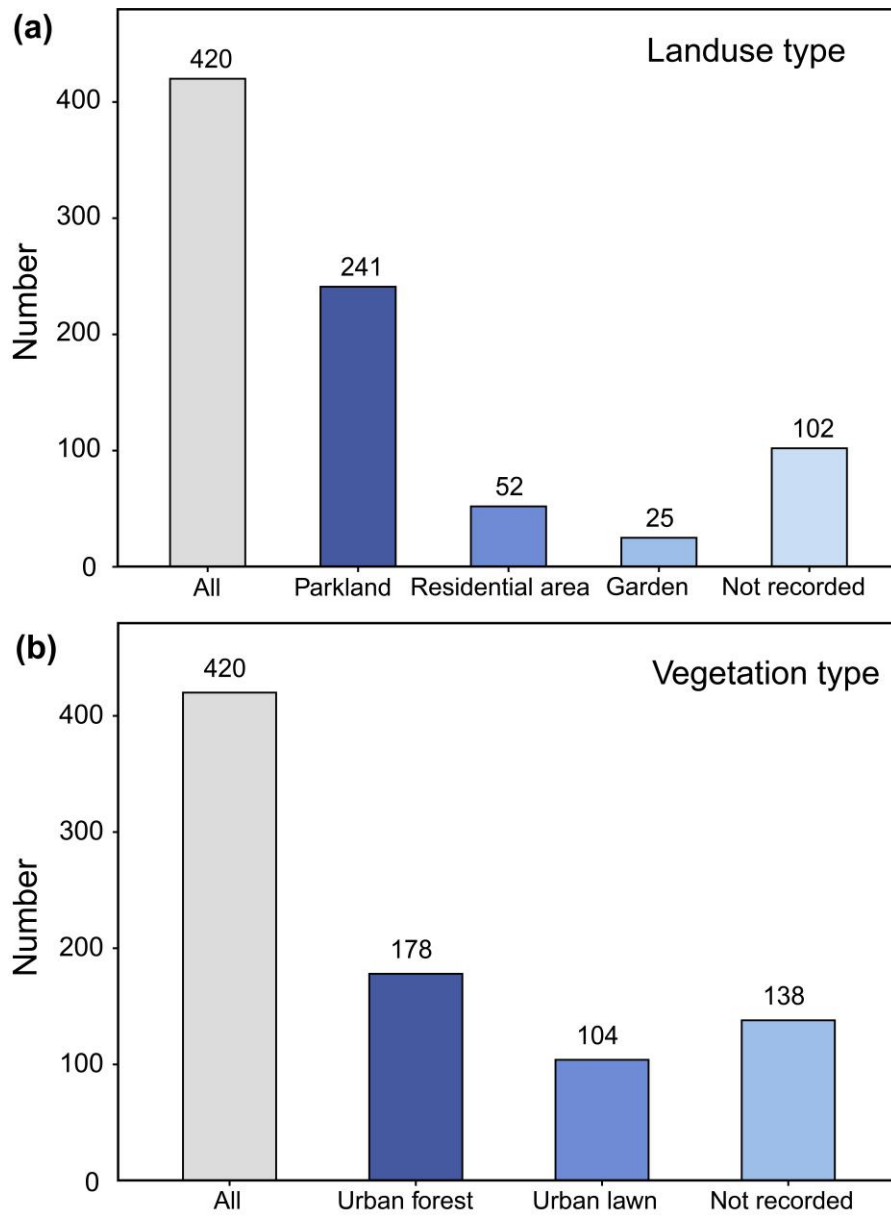

**Supplementary Fig. 4. Land use type (a) and vegetation type (b) for urban greenspaces in SOC-U database.** The numbers above the bar indicate the sample size.

Source data are provided as a Source Data file.

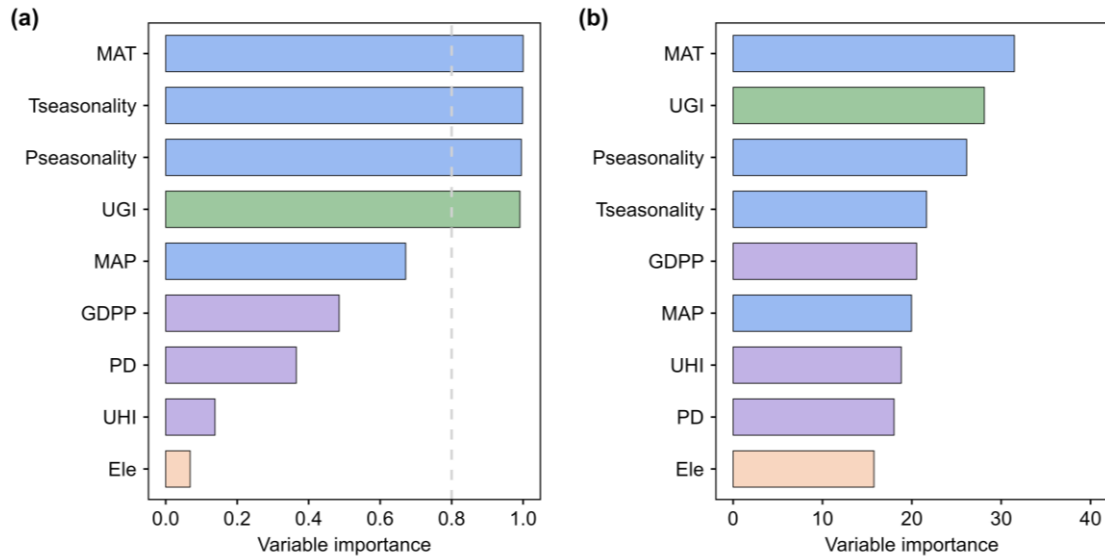

**Supplementary Fig. 5. Relative importance of the potential predictors for SOC density (SOCd) based on linear model analysis (a) and random forest analysis (b).**

All data of SOC-U were used for the analysis (n=420). The variable importance shown in **a** is based on the sum of the Akaike weights derived from model selection using corrected Akaike information criterion. The cut-off is set at 0.8 (dashed line) to differentiate among the important predictors. The importance shown in **b** is based on Mean Decrease Gini of random forest models. Abbreviations: MAT, mean annual air temperature; MAP, mean annual precipitation; Tseasonality, temperature seasonality, Pseasonality, precipitation seasonality; UGI, urban greenness index; GDPP, GDP per capita; PD, population density; UHI, urban heat island index; Ele, city elevation. Source data are provided as a Source Data file.

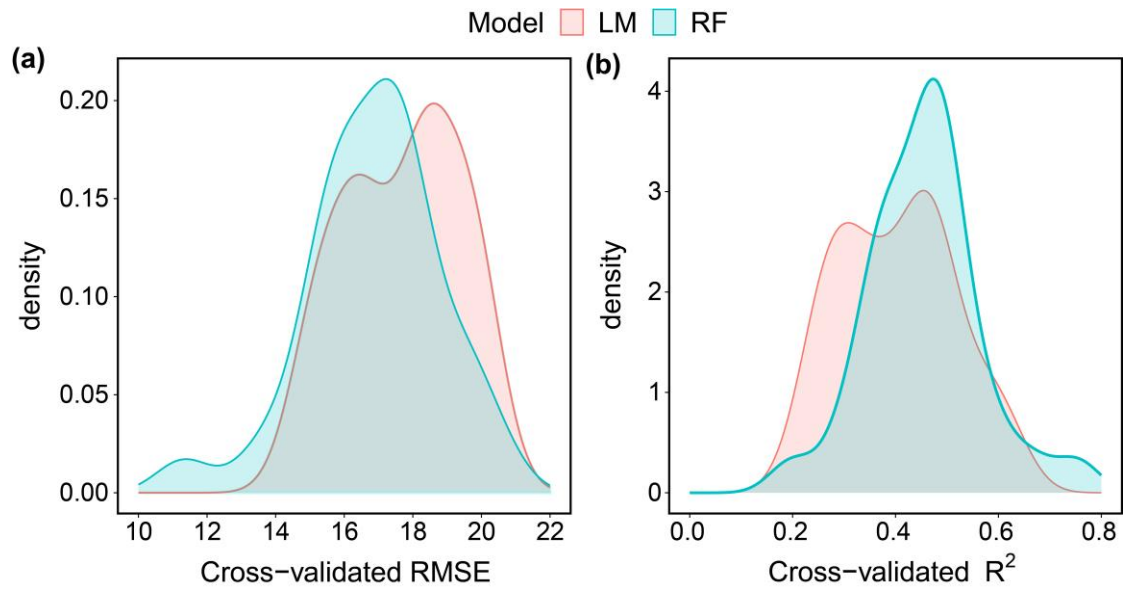

**Supplementary Fig. 6. Density plot comparing cross-validated RMSE (a) and cross-validated  $R^2$  (b) for the linear model (LM) and the random-forest model (RF). Source data are provided as a Source Data file.**

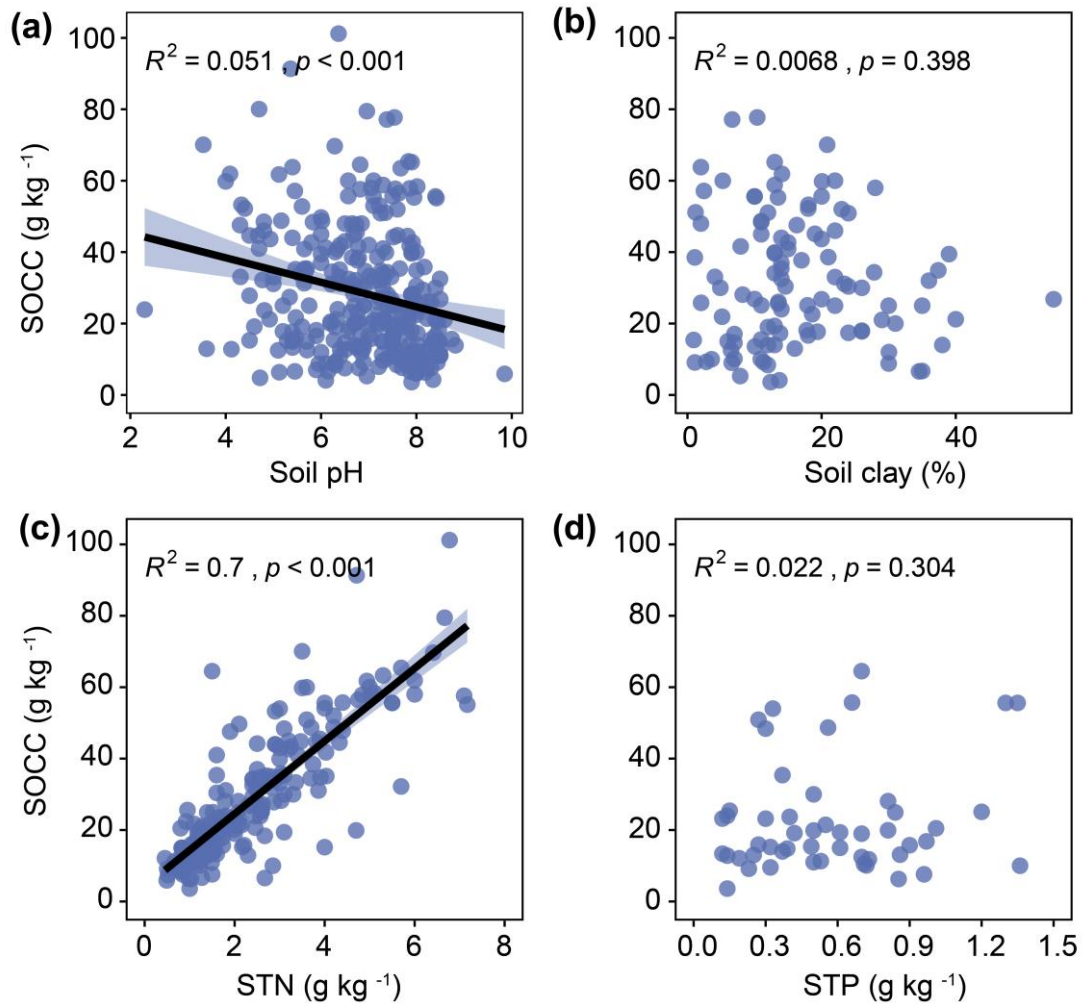

**Supplementary Fig. 7. Relationships between surface SOC concentration (SOCC, g kg<sup>-1</sup>) (0-20 cm) and soil pH (a), soil clay fraction (%) (b), soil total nitrogen concentration (STN, g kg<sup>-1</sup>) (c), soil total phosphorus concentration (STP, g kg<sup>-1</sup>) (d) in urban greenspaces. The shaded area represents the 95% confidence interval. Source data are provided as a Source Data file.**



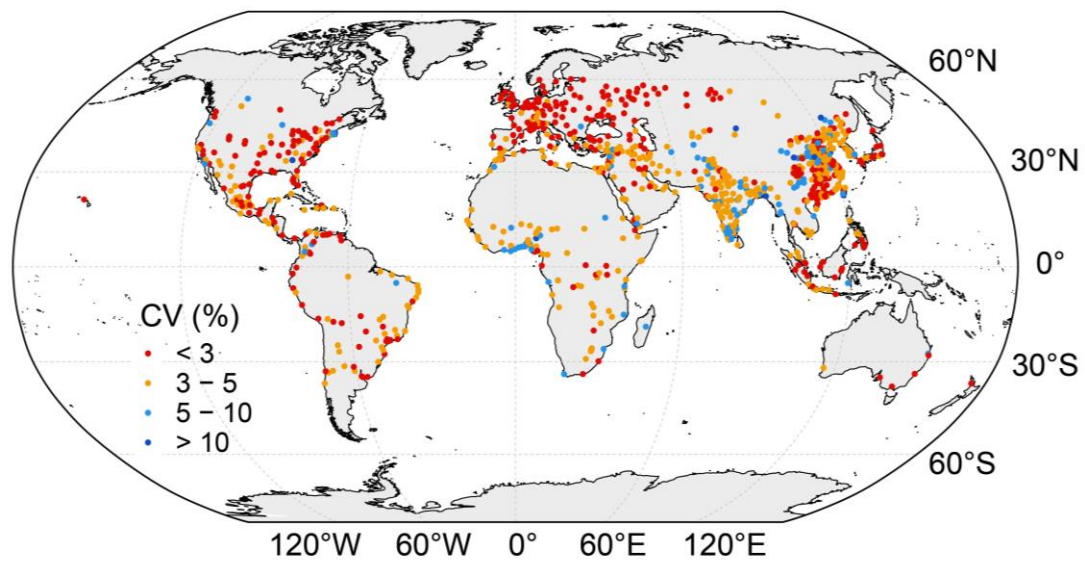

**Supplementary Fig. 8. Coefficients of variance (CV, %) of predicted surface soil organic carbon density (SOCD) (0-20 cm) in global urban greenspaces.** The world map was created using R 4.0.5 (see more details in Methods section). Source data are provided as a Source Data file.

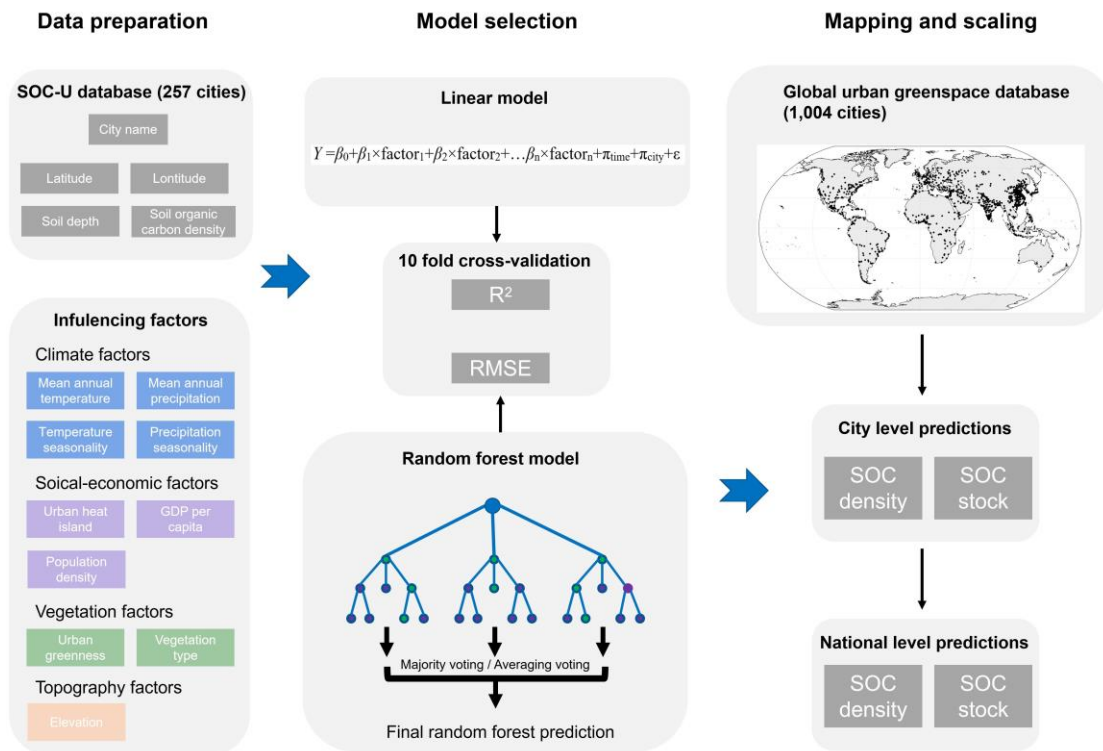

**Supplementary Fig. 9. A conceptual framework for data collection and analysis.**

The world map was created using R 4.0.5 (see more details in Methods section). The conceptual figure of the random forest model was created in Microsoft PowerPoint 2019. Source data are provided as a Source Data file.

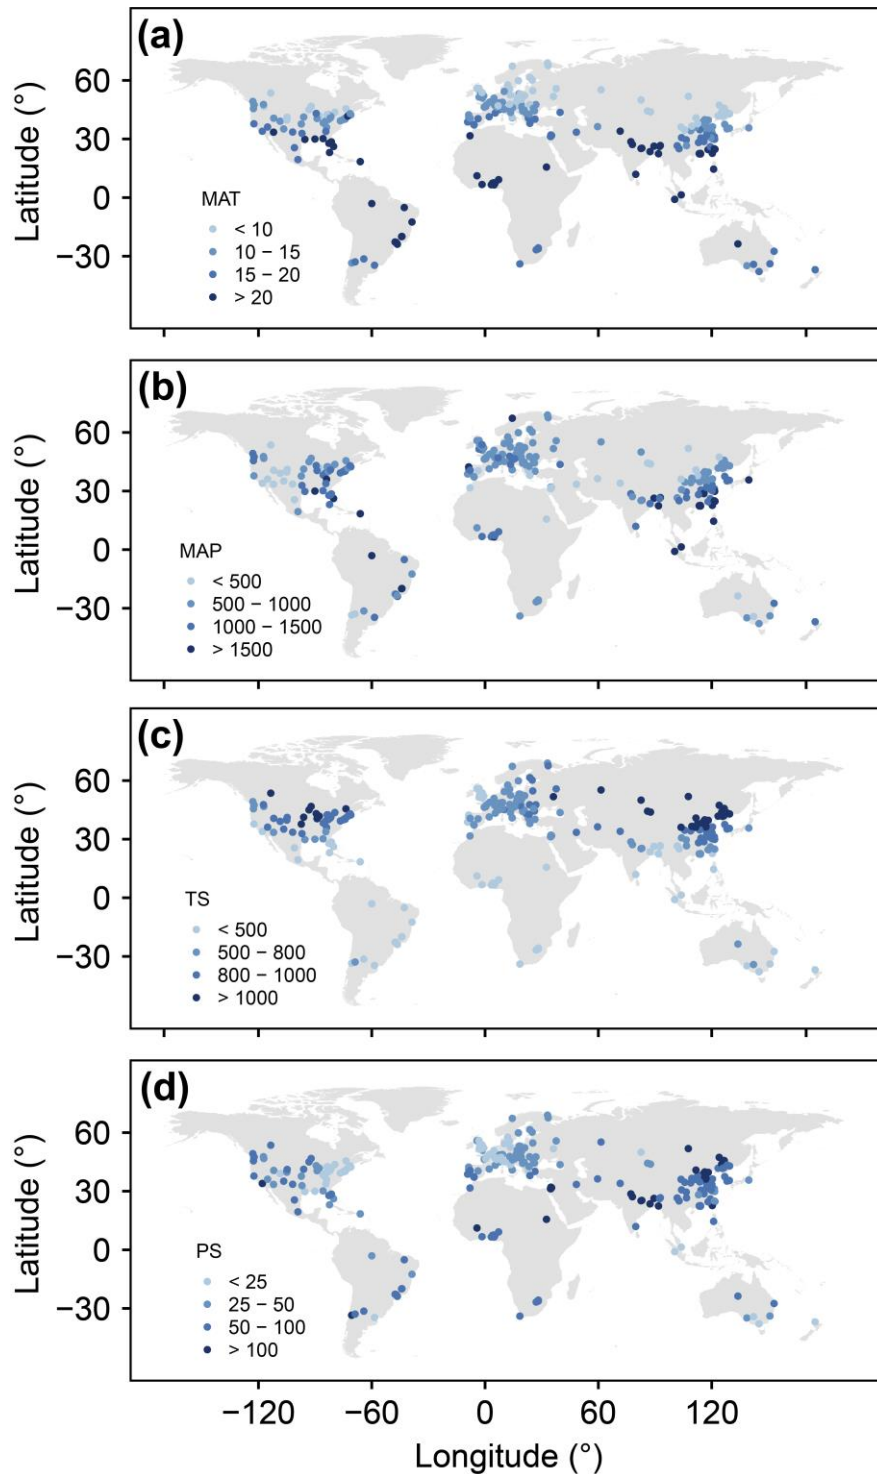

**Supplementary Fig. 10. Spatial distribution of climatic variables for sampling cities in the SOC-U database. a-d,** mean annual temperature (MAT, °C) **(a)**, mean annual precipitation (MAP, mm) **(b)**, temperature seasonality (TS,  $10^{-2}$  °C) **(c)**, and precipitation seasonality (PS, %) **(d)**. The maps were created using R 4.0.5 (see more details in Methods section). Source data are provided as a Source Data file.

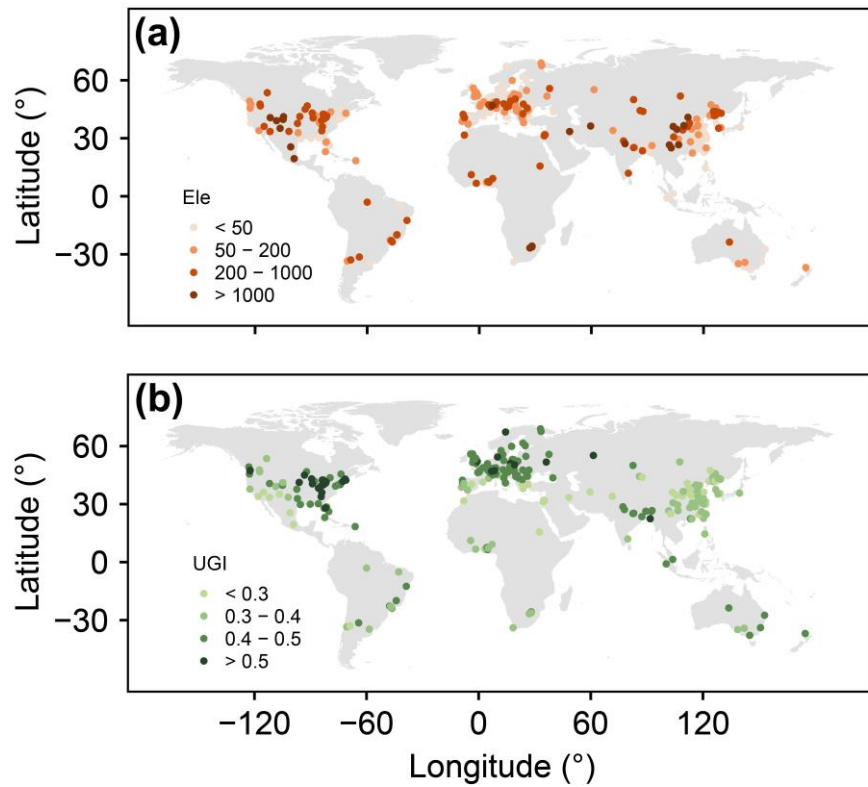

**Supplementary Fig. 11. Spatial distribution of topographical and vegetational variables for sampling cities in the SOC-U database. a-b, elevation (Ele, m) (a), and urban greenness index (UGI) (b). The maps were created using R 4.0.5 (see more details in Methods section). Source data are provided as a Source Data file.**

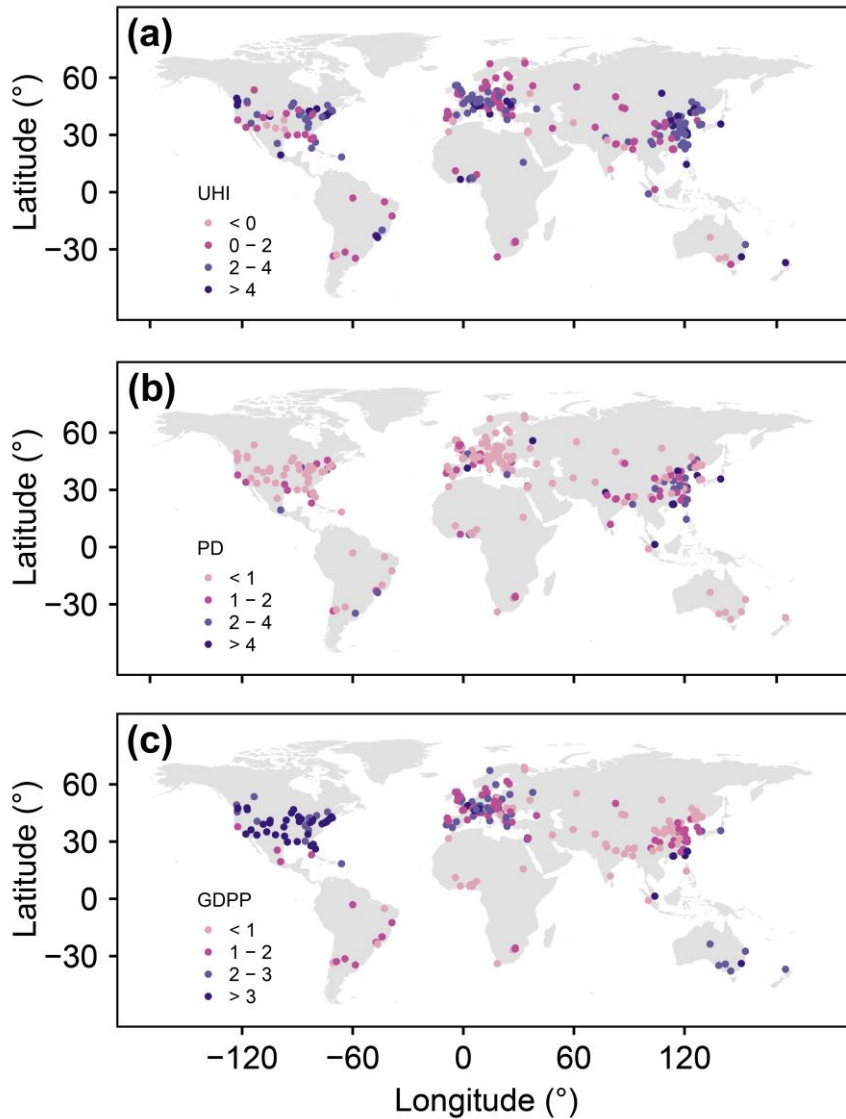

**Supplementary Fig. 12. Spatial distribution of social-economic variables for sampling cities in the SOC-U database. a-c, urban heat island index (UHI, °C) (a), urban population density (PD,  $10^3$  people  $\text{km}^{-2}$ ) (b), and GDP per capita (GDPP,  $10^4$  USD) (c). The maps were created using R 4.0.5 (see more details in Methods section). Source data are provided as a Source Data file.**

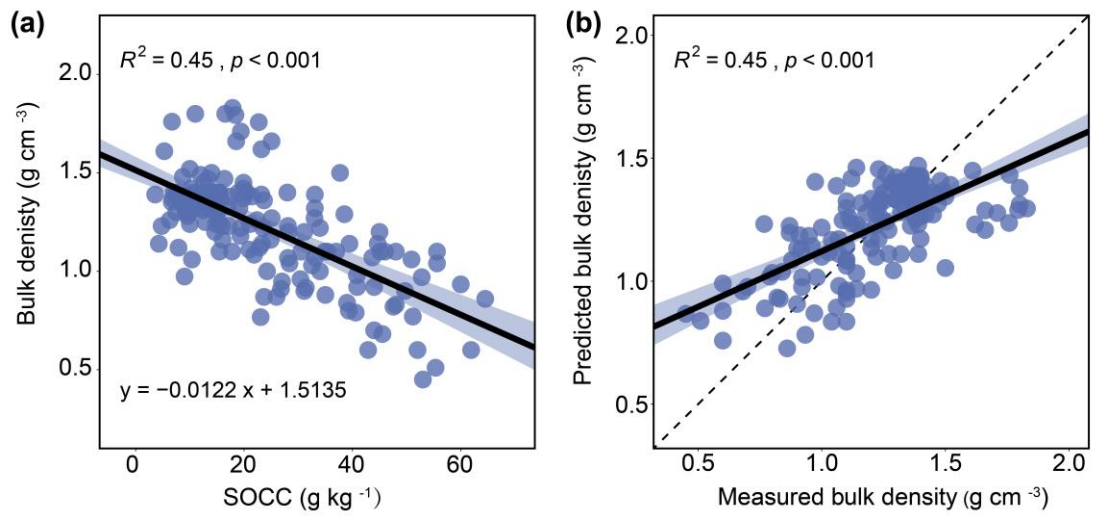

**Supplementary Fig. 13. Relationships between observed surface SOC concentration (SOCC,  $\text{g kg}^{-1}$ ) (0-20 cm) and soil bulk density ( $\text{g cm}^{-3}$ ) in urban greenspaces (a) and predicted versus observed values of soil bulk density (b). The shaded area represents the 95% confidence interval. The 1:1 line is plotted in b. Source data are provided as a Source Data file.**

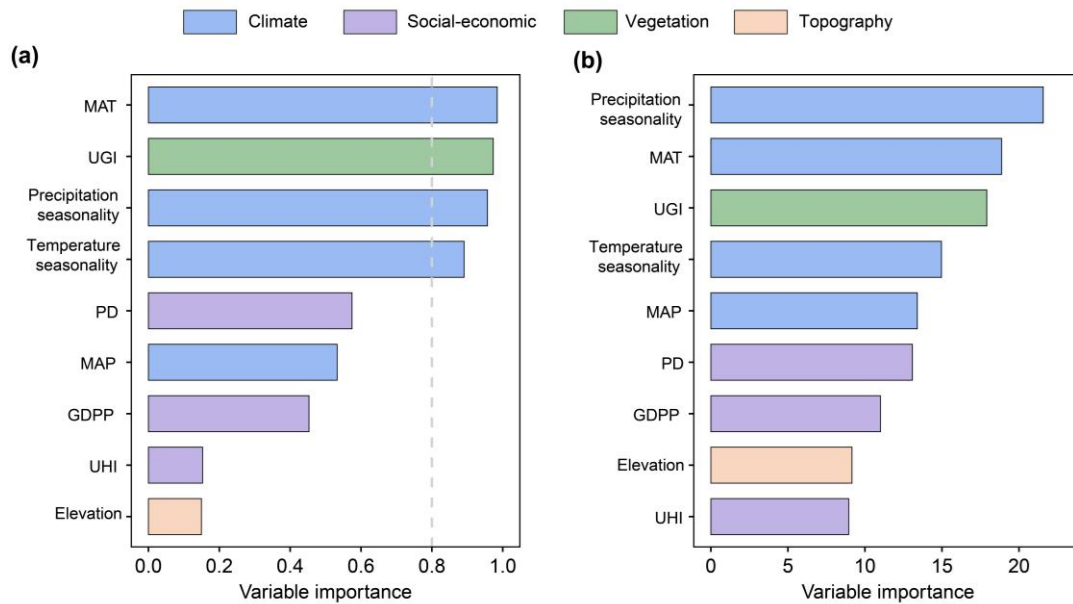

**Supplementary Fig. 14. Relative importance of the potential predictors for surface SOC density (SOCD) based on linear model analysis (a) and random forest analysis (b).** Only data with reported information on soil bulk density were used for the analysis (n=155). The variable importance shown in **a** is based on the sum of the Akaike weights derived from model selection using corrected Akaike information criterion. The cut-off is set at 0.8 (dashed line) to differentiate among the important predictors. The importance shown in **b** is based on Mean Decrease Gini of random forest models. Abbreviations: UGI, urban greenness index, MAT, mean annual air temperature; MAP, mean annual precipitation; GDPP, GDP per capita; PD, population density, UHI, urban heat island index. Source data are provided as a Source Data file.

**Supplementary Table 1. Descriptions of the data sets on potential predictors used for model selection.**

| <b>ID</b> | <b>Variable</b>           | <b>Unit</b>              | <b>Type</b>   | <b>Source</b>                                            | <b>Reference</b> |
|-----------|---------------------------|--------------------------|---------------|----------------------------------------------------------|------------------|
| 1         | MAT                       | °C                       | Climate       | References for the data                                  | /                |
| 2         | MAP                       | mm                       | Climate       | References for the data                                  | /                |
| 3         | Temperature seasonality   | 10 <sup>-2</sup> °C      | Climate       | WorldClim database                                       | 1                |
| 4         | Precipitation seasonality | %                        | Climate       | WorldClim database                                       | 1                |
| 5         | Elevation                 | m                        | Topography    | Global Human Settlement Layer (GHSL) Data Package, 2015  | 2                |
| 6         | Vegetation type           | /                        | Vegetation    | References for the data                                  | /                |
| 7         | Urban greenness index     | /                        | Vegetation    | Global Human Settlement Layer (GHSL) Data Package, 2015  | 2, 3             |
| 8         | Urban heat island index   | °C                       | Socioeconomic | Global Urban Heat Island (UHI) Data Set, 2013            | 4                |
| 9         | GDP per capita            | USD                      | Socioeconomic | Global Human Settlement Layer (GHSL) Data Package, 2015  | 2, 5             |
| 10        | Population density        | People / km <sup>2</sup> | Socioeconomic | Gridded Population of the World Version 4 (GPW v4), 2015 | 6                |



**Supplementary Table 2. Descriptions of the data sets on important predictors used for global prediction and upscaling.**

| <b>ID</b> | <b>Variable</b>           | <b>Unit</b>              | <b>Description</b>                                       | <b>Reference</b> |
|-----------|---------------------------|--------------------------|----------------------------------------------------------|------------------|
| 1         | MAT                       | °C                       | Global Human Settlement Layer (GHSL) Data Package, 2015  | 2                |
| 2         | MAP                       | mm                       | Global Human Settlement Layer (GHSL) Data Package, 2015  | 2                |
| 3         | Elevation                 | m                        | Global Human Settlement Layer (GHSL) Data Package, 2015  | 2                |
| 4         | Temperature seasonality   | 10 <sup>-2</sup> °C      | WorldClim2 database                                      | 1                |
| 5         | Precipitation seasonality | %                        | WorldClim2 database                                      | 1                |
| 6         | Urban greenness index     | /                        | Global Human Settlement Layer (GHSL) Data Package, 2015  | 2, 3             |
| 7         | Urban heat island index   | °C                       | Global Urban Heat Island (UHI) Data Set, 2013            | 4                |
| 8         | GDP per capita            | USD                      | Global Human Settlement Layer (GHSL) Data Package, 2015  | 2, 5             |
| 9         | Population density        | People / km <sup>2</sup> | Gridded Population of the World Version 4 (GPW v4), 2015 | 6                |
| 10        | Urban greenspace coverage | %                        | Global urban green spaces in 1039 cities, 2015           | 7                |
| 11        | Urban built-up area       | km <sup>2</sup>          | Global Human Settlement Layer (GHSL) Data Package, 2015  | 2                |

**Supplementary Table 3. Comparison of model performance among two different models, based on ten-fold cross validation.**  $R^2$  and root mean square error (RMSE) were used to evaluate the performance of the models.

| Model             | SOCD  |       |
|-------------------|-------|-------|
|                   | $R^2$ | RMSE  |
| Linear regression | 0.40  | 17.64 |
| Random forest     | 0.46  | 16.85 |

**Supplementary Table 4. Significance of random factors.**

Model:

SOCD20 ~ UGI + MAT + T\_seasonality + P\_seasonality + (1 | City) + (1 | Year)

|            | npar | logLik  | AIC    | LRT    | Df | Pr(>Chisq)    |
|------------|------|---------|--------|--------|----|---------------|
| <none>     | 8    | -1785.9 | 3587.9 |        |    |               |
| (1   City) | 7    | -1802.7 | 3619.5 | 33.594 | 1  | 6.791e-09 *** |
| (1   Year) | 7    | -1785.9 | 3585.9 | 0.000  | 1  | 1             |

---

Signif. codes: 0 '\*\*\*' 0.001 '\*\*' 0.01 '\*' 0.05 '.'

**Supplementary Table 5. The global database of soil organic carbon (SOC) concentration and density of greenspaces in urban built-up areas (SOC-U).** Abbreviations: Lat, latitude (°); Lon, longitude (°); Depth, soil sampling depth (cm); Ele, city elevation (m); MAT, mean annual air temperature (°C); MAP, mean annual precipitation (mm); TS, temperature seasonality ( $10^{-2}$  °C); PS, precipitation seasonality (%); PD, population density (People km<sup>-2</sup>); GDPP, GDP per capita (USD); UGI, urban greenness index; UHI, urban heat island index (°C); SOCC, soil organic carbon concentration (g kg<sup>-1</sup>); SOCD, soil organic carbon density (Mg ha<sup>-1</sup>); SOCD20, soil organic carbon density (0-20 cm) (Mg ha<sup>-1</sup>). Source data are provided as a Source Data file.

| ID | City      | Lat | Lon | Depth | Vegetation   | Ele | MAT | MAP  | TS   | PS  | PD   | GDPP  | UGI  | UHI   | SOCC  | SOCD  | SOCD20 | Reference |
|----|-----------|-----|-----|-------|--------------|-----|-----|------|------|-----|------|-------|------|-------|-------|-------|--------|-----------|
| 1  | Adelaide  | -35 | 139 | 10    | Urban forest | 53  | 12  | 551  | 419  | 43  | 427  | 25729 | 0.34 | -0.85 | 38.60 | 40.24 | 72.66  | 8         |
| 2  | Adelaide  | -35 | 139 | 10    | Urban forest | 53  | 12  | 551  | 419  | 43  | 427  | 25729 | 0.34 | -0.85 | 16.67 | 21.84 | 39.43  | 9         |
| 3  | Athens    | 38  | 24  | 10    |              | 155 | 19  | 365  | 681  | 65  | 2625 | 20302 | 0.27 | 3.67  | 26.05 | 31.15 | 56.24  | 10        |
| 4  | Athens    | 38  | 24  | 20    | Urban forest | 155 | 19  | 365  | 681  | 65  | 2625 | 20302 | 0.27 | 3.67  | 23.00 | 56.71 | 56.71  | 11        |
| 5  | Auckland  | -37 | 175 | 10    | Urban forest | 53  | 18  | 1200 | 322  | 20  | 895  | 22786 | 0.47 | 4.18  | 55.33 | 28.22 | 50.95  | 12        |
| 6  | Auckland  | -37 | 175 | 10    | Urban forest | 53  | 18  | 1200 | 322  | 20  | 895  | 22786 | 0.47 | 4.18  | 44.00 | 30.80 | 55.61  | 13        |
| 7  | Aveiro    | 40  | -8  | 20    |              | 16  | 18  | 1000 | 438  | 51  | 114  | 12720 | 0.38 | 1.45  | 13.50 | 36.42 | 36.42  | 14        |
| 8  | Baltimore | 39  | -77 | 10    | Urban forest | 10  | 14  | 1080 | 897  | 11  | 939  | 32721 | 0.47 | 2.86  | 59.80 | 46.88 | 84.64  | 15        |
| 9  | Baltimore | 39  | -77 | 10    | Urban lawn   | 10  | 14  | 1080 | 897  | 11  | 939  | 32721 | 0.47 | 2.86  | 37.00 | 40.70 | 73.48  | 16        |
| 10 | Baltimore | 39  | -77 | 10    | Urban forest | 10  | 14  | 1080 | 897  | 11  | 939  | 32721 | 0.47 | 2.86  | 35.38 | 38.92 | 70.27  | 17        |
| 11 | Baltimore | 39  | -77 | 10    | Urban lawn   | 10  | 14  | 1080 | 897  | 11  | 939  | 32721 | 0.47 | 2.86  | 24.00 | 29.30 | 52.89  | 18        |
| 12 | Beijing   | 40  | 116 | 20    | Urban forest | 51  | 12  | 640  | 1098 | 133 | 6609 | 16241 | 0.33 | 4.90  | 6.80  | 18.63 | 18.63  | 19        |
| 13 | Beijing   | 40  | 116 | 20    | Urban forest | 51  | 12  | 640  | 1098 | 133 | 6609 | 16241 | 0.33 | 4.90  | 8.21  | 22.33 | 22.33  | 20        |
| 14 | Beijing   | 40  | 116 | 15    |              | 51  | 12  | 640  | 1098 | 133 | 6609 | 16241 | 0.33 | 4.90  | 9.10  | 18.75 | 23.76  | 21        |
| 15 | Beijing   | 40  | 116 | 20    |              | 51  | 12  | 640  | 1098 | 133 | 6609 | 16241 | 0.33 | 4.90  | 9.71  | 27.00 | 27.00  | 22        |
| 16 | Beijing   | 40  | 116 | 20    | Urban forest | 51  | 12  | 640  | 1098 | 133 | 6609 | 16241 | 0.33 | 4.90  | 10.00 | 30.40 | 30.40  | 23        |

| ID | City           | Lat | Lon | Depth | Vegetation   | Ele | MAT | MAP  | TS   | PS  | PD   | GDPP  | UGI  | UHI  | SOCC  | SOCD  | SOCD20 | Reference |
|----|----------------|-----|-----|-------|--------------|-----|-----|------|------|-----|------|-------|------|------|-------|-------|--------|-----------|
| 17 | Belgrade       | 45  | 20  | 20    |              | 117 | 12  | 700  | 784  | 26  | 560  | 16084 | 0.45 | 0.85 | 12.00 | 32.81 | 32.81  | 24        |
| 18 | Belgrade       | 45  | 20  | 10    | Urban forest | 117 | 12  | 700  | 784  | 26  | 560  | 16084 | 0.45 | 0.85 | 55.60 | 46.44 | 83.84  | 25        |
| 19 | Berlin         | 53  | 13  | 20    | Urban forest | 35  | 9   | 580  | 698  | 18  | 878  | 23559 | 0.49 | 2.02 | 24.23 | 48.46 | 48.46  | 26        |
| 20 | Bloomington    | 40  | -89 | 15    | Urban forest | 252 | 12  | 1207 | 1040 | 28  | 43   | 31723 | 0.55 | 2.28 | 39.33 | 47.20 | 59.82  | 27        |
| 21 | Bobo-Dioulasso | 11  | -4  | 20    |              | 460 | 28  | 900  | 181  | 106 | 292  | 1191  | 0.33 | 1.76 | 20.00 | 50.78 | 50.78  | 28        |
| 22 | Boston         | 42  | -71 | 15    | Urban forest | 14  | 14  | 1050 | 926  | 8   | 1094 | 43495 | 0.52 | 2.77 | 48.00 | 59.76 | 75.74  | 29        |
| 23 | Boston         | 42  | -71 | 15    | Urban forest | 14  | 14  | 1050 | 926  | 8   | 1094 | 43495 | 0.52 | 2.77 | 51.14 | 59.07 | 74.86  | 30        |
| 24 | Brasov         | 46  | 26  | 10    | Urban forest | 774 | 11  | 832  | 795  | 50  | 106  | 14097 | 0.41 | 5.11 | 32.00 | 35.94 | 64.89  | 31        |
| 25 | Budapest       | 47  | 19  | 10    | Urban lawn   | 100 | 11  | 533  | 781  | 25  | 557  | 27860 | 0.45 | 1.97 | 25.40 | 30.57 | 55.20  | 18        |
| 26 | Buenos Aires   | -35 | -59 | 20    | Urban forest | 31  | 17  | 1146 | 490  | 25  | 2700 | 18763 | 0.34 | 0.61 | 25.00 | 60.43 | 60.43  | 32        |
| 27 | Campinas       | -23 | -47 | 10    | Urban forest | 693 | 21  | 1462 | 229  | 67  | 1007 | 17644 | 0.36 | 4.44 | 15.29 | 21.41 | 38.65  | 33        |
| 28 | Carpi          | 45  | 10  | 15    | Urban forest | 29  | 14  | 657  | 806  | 20  | 246  | 15696 | 0.38 | 0.37 | 23.30 | 39.84 | 50.50  | 34        |
| 29 | Changchun      | 44  | 125 | 20    | Urban forest | 300 | 5   | 650  | 1392 | 110 | 1771 | 8323  | 0.34 | 4.36 | 21.46 | 59.22 | 59.22  | 35        |
| 30 | Changsha       | 28  | 113 | 15    | Urban forest | 54  | 17  | 1360 | 869  | 48  | 897  | 10579 | 0.31 | 0.42 | 19.14 | 37.90 | 48.04  | 36        |
| 31 | Chattogram     | 22  | 92  | 10    |              | 20  | 29  | 2800 | 316  | 106 | 4018 | 3932  | 0.54 | 0.54 | 5.29  | 8.52  | 15.38  | 37        |
| 32 | Chengdu        | 31  | 104 | 20    | Urban forest | 500 | 16  | 945  | 710  | 99  | 3336 | 13406 | 0.33 | 0.67 | 17.15 | 42.20 | 42.20  | 38        |
| 33 | Chengdu        | 31  | 104 | 20    |              | 500 | 16  | 945  | 710  | 99  | 3336 | 13406 | 0.33 | 0.67 | 17.89 | 65.48 | 65.48  | 39        |
| 34 | Chengdu        | 31  | 104 | 10    | Urban forest | 500 | 16  | 945  | 710  | 99  | 3336 | 13406 | 0.33 | 0.67 | 28.09 | 34.55 | 62.38  | 40        |
| 35 | Chicago        | 42  | -88 | 10    | Urban lawn   | 179 | 10  | 96   | 1040 | 27  | 2070 | 35379 | 0.48 | 3.96 | 58.00 | 46.74 | 84.39  | 41        |
| 36 | Chicago        | 42  | -88 | 10    |              | 179 | 10  | 96   | 1040 | 27  | 2070 | 35379 | 0.48 | 3.96 | 60.00 | 46.89 | 84.66  | 41        |
| 37 | Chongqing      | 30  | 107 | 20    |              | 163 | 18  | 1200 | 751  | 68  | 1110 | 12697 | 0.39 | 2.39 | 19.34 | 45.64 | 45.64  | 42        |
| 38 | Columbus       | 40  | -83 | 20    | Urban forest | 235 | 11  | 950  | 943  | 22  | 216  | 30360 | 0.51 | 3.38 | 35.00 | 61.60 | 61.60  | 43        |
| 39 | Cooch Behar    | 26  | 89  | 20    | Urban forest | 43  | 29  | 2305 | 409  | 109 | 1041 | 9543  | 0.47 | 2.60 | 6.66  | 18.00 | 18.00  | 44        |
| 40 | Cordoba        | -31 | -64 | 20    | Urban forest | 500 | 18  | 750  | 469  | 73  | 558  | 15093 | 0.43 | 1.04 | 11.30 | 31.09 | 31.09  | 45        |
| 41 | Coventry       | 52  | -1  | 15    | Urban lawn   | 86  | 10  | 800  | 462  | 11  | 275  | 15309 | 0.47 | 2.15 | 25.00 | 45.32 | 57.44  | 46        |
| 42 | Dongguan       | 23  | 113 | 10    | Urban forest | 21  | 22  | 1796 | 538  | 72  | 3337 | 6855  | 0.34 | 1.98 | 15.95 | 19.62 | 35.42  | 47        |

| ID | City      | Lat | Lon | Depth | Vegetation   | Ele  | MAT | MAP  | TS   | PS  | PD   | GDPP  | UGI  | UHI   | SOCC  | SOCD  | SOCD20 | Reference |
|----|-----------|-----|-----|-------|--------------|------|-----|------|------|-----|------|-------|------|-------|-------|-------|--------|-----------|
| 43 | Franklin  | 30  | -86 | 10    | Urban forest | 4    | 20  | 1425 | 616  | 30  | 110  | 27901 | 0.42 | 0.23  | 31.11 | 28.00 | 50.55  | 48        |
| 44 | Fuzhou    | 26  | 119 | 20    | Urban forest | 30   | 20  | 1348 | 671  | 59  | 1283 | 12618 | 0.32 | 3.15  | 12.50 | 35.00 | 35.00  | 49        |
| 45 | Glasgow   | 56  | -4  | 20    |              | 44   | 9   | 900  | 415  | 30  | 821  | 16967 | 0.47 | 2.02  | 48.50 | 89.41 | 89.41  | 14        |
| 46 | Guangzhou | 22  | 113 | 20    | Urban forest | 22   | 21  | 1720 | 539  | 74  | 5063 | 22218 | 0.43 | 1.98  | 12.82 | 35.64 | 35.64  | 50        |
| 47 | Guangzhou | 22  | 113 | 20    | Urban forest | 22   | 21  | 1720 | 539  | 74  | 5063 | 22218 | 0.43 | 1.98  | 17.00 | 45.22 | 45.22  | 51        |
| 48 | Guangzhou | 22  | 113 | 20    | Urban forest | 22   | 21  | 1720 | 539  | 74  | 5063 | 22218 | 0.43 | 1.98  | 23.18 | 64.44 | 64.44  | 52        |
| 49 | Hangzhou  | 30  | 120 | 20    |              | 19   | 18  | 1454 | 869  | 44  | 3097 | 14873 | 0.32 | 3.31  | 12.84 | 34.84 | 34.84  | 53        |
| 50 | Hangzhou  | 30  | 120 | 15    | Urban forest | 19   | 18  | 1454 | 869  | 44  | 3097 | 14873 | 0.32 | 3.31  | 16.39 | 36.13 | 45.80  | 54        |
| 51 | Hefei     | 32  | 117 | 20    | Urban forest | 120  | 17  | 1300 | 922  | 53  | 2085 | 6347  | 0.32 | 2.51  | 23.68 | 64.41 | 64.41  | 55        |
| 52 | Helsinki  | 60  | 25  | 10    | Urban forest | 25   | 5   | 682  | 821  | 30  | 718  | 18877 | 0.43 | 1.94  | 56.00 | 46.50 | 83.95  | 56        |
| 53 | Montreal  | 46  | -74 | 20    | Urban forest | 33   | 7   | 897  | 1149 | 13  | 1127 | 22658 | 0.41 | 2.76  | 44.22 | 86.14 | 86.14  | 57        |
| 54 | Helsinki  | 60  | 25  | 10    | Urban lawn   | 25   | 5   | 682  | 821  | 30  | 718  | 18877 | 0.43 | 1.94  | 48.70 | 44.77 | 80.84  | 18        |
| 55 | Hohhot    | 41  | 112 | 20    |              | 1050 | 8   | 450  | 1253 | 108 | 979  | 9088  | 0.27 | 3.36  | 14.91 | 38.76 | 38.76  | 58        |
| 56 | Ibadan    | 7   | 4   | 20    |              | 170  | 27  | 1270 | 129  | 64  | 952  | 6226  | 0.33 | 4.84  | 23.20 | 75.17 | 75.17  | 59        |
| 57 | Jinan     | 37  | 117 | 20    | Urban forest | 142  | 14  | 670  | 1064 | 112 | 1330 | 11609 | 0.31 | 2.77  | 6.56  | 18.81 | 18.81  | 60        |
| 58 | Jinju-si  | 35  | 128 | 20    |              | 350  | 12  | 1300 | 916  | 81  | 235  | 12932 | 0.35 | 2.90  | 9.02  | 17.56 | 17.56  | 61        |
| 59 | Kiel      | 54  | 10  | 10    | Urban forest | 21   | 12  | 775  | 598  | 18  | 319  | 17501 | 0.51 | 1.03  | 41.00 | 41.55 | 75.01  | 62        |
| 60 | Kumasi    | 7   | -2  | 15    | Urban forest | 258  | 26  | 1250 | 107  | 53  | 1288 | 2935  | 0.35 | 4.92  | 11.00 | 29.70 | 37.64  | 63        |
| 61 | Kumasi    | 7   | -2  | 15    | Urban forest | 258  | 26  | 1250 | 107  | 53  | 1288 | 2935  | 0.35 | 4.92  | 16.53 | 44.63 | 56.57  | 64        |
| 62 | Kursk     | 52  | 36  | 10    |              | 196  | 10  | 607  | 1009 | 25  | 221  | 6451  | 0.50 | -0.52 | 32.10 | 36.01 | 65.02  | 65        |
| 63 | Lahti     | 61  | 24  | 10    | Urban lawn   | 40   | 5   | 636  | 868  | 33  | 90   | 12500 | 0.42 | 1.10  | 48.40 | 44.67 | 80.66  | 18        |
| 64 | Lahti     | 61  | 24  | 10    | Urban lawn   | 40   | 5   | 636  | 868  | 33  | 90   | 12500 | 0.42 | 1.10  | 45.00 | 54.00 | 97.50  | 16        |
| 65 | Lanzhou   | 36  | 104 | 20    | Urban forest | 1520 | 10  | 311  | 1011 | 93  | 1088 | 8200  | 0.24 | 0.79  | 11.02 | 29.10 | 29.10  | 66        |
| 66 | Leicester | 53  | -1  | 20    | Urban forest | 51   | 8   | 606  | 479  | 10  | 1016 | 15603 | 0.43 | 2.15  | 53.00 | 47.70 | 47.70  | 67        |
| 67 | Leuven    | 51  | 5   | 20    | Urban forest | 10   | 11  | 729  | 554  | 12  | 382  | 27823 | 0.48 | 2.05  | 35.38 | 76.56 | 76.56  | 68        |
| 68 | Liverpool | 53  | -3  | 15    |              | 50   | 9   | 796  | 445  | 20  | 943  | 16099 | 0.43 | 1.93  | 48.00 | 79.20 | 100.38 | 69        |

| ID | City                 | Lat | Lon  | Depth | Vegetation   | Ele | MAT | MAP  | TS   | PS | PD   | GDPP  | UGI  | UHI   | SOCC  | SOCD   | SOCD20 | Reference |
|----|----------------------|-----|------|-------|--------------|-----|-----|------|------|----|------|-------|------|-------|-------|--------|--------|-----------|
| 69 | Ljubljana            | 46  | 15   | 20    |              | 302 | 10  | 1452 | 768  | 25 | 161  | 22088 | 0.47 | 3.94  | 48.00 | 89.08  | 89.08  | 14        |
| 70 | Louisville           | 38  | -86  | 10    | Urban forest | 142 | 14  | 1130 | 898  | 16 | 432  | 28029 | 0.54 | 3.63  | 47.56 | 39.00  | 70.42  | 70        |
| 71 | Louisville           | 38  | -86  | 15    | Urban forest | 142 | 14  | 1130 | 898  | 16 | 432  | 28029 | 0.54 | 3.63  | 31.11 | 56.00  | 70.98  | 71        |
| 72 | Madison              | 43  | -89  | 20    | Urban forest | 267 | 18  | 1300 | 1077 | 39 | 191  | 30554 | 0.52 | 1.39  | 28.09 | 60.00  | 60.00  | 72        |
| 73 | Manchester           | 53  | -2   | 10    |              | 47  | 10  | 600  | 449  | 19 | 1114 | 31530 | 0.50 | 1.93  | 52.79 | 51.20  | 92.45  | 73        |
| 74 | Quezon City [Manila] | 15  | 121  | 10    | Urban forest | 10  | 27  | 1666 | 108  | 88 | 3909 | 9118  | 0.35 | 5.95  | 33.00 | 36.66  | 66.19  | 74        |
| 75 | Marrakesh            | 32  | -8   | 20    | Urban forest | 454 | 25  | 240  | 576  | 64 | 481  | 4967  | 0.24 | -0.54 | 7.60  | 21.28  | 21.28  | 75        |
| 76 | Marrakesh            | 32  | -8   | 15    |              | 454 | 25  | 240  | 576  | 64 | 481  | 4967  | 0.24 | -0.54 | 11.11 | 22.96  | 29.11  | 76        |
| 77 | Marseille            | 43  | 5    | 10    |              | 12  | 16  | 515  | 576  | 43 | 1534 | 20314 | 0.39 | 2.66  | 54.00 | 46.15  | 83.33  | 77        |
| 78 | Melbourne            | -38 | 145  | 20    |              | 27  | 16  | 647  | 375  | 14 | 964  | 27030 | 0.40 | 1.96  | 48.80 | 89.61  | 89.61  | 78        |
| 79 | Milan                | 46  | 9    | 20    | Urban forest | 100 | 14  | 920  | 755  | 23 | 1374 | 24235 | 0.43 | 4.30  | 22.83 | 51.14  | 51.14  | 79        |
| 80 | Moscow               | 56  | 38   | 10    |              | 200 | 7   | 706  | 983  | 31 | 6823 | 20523 | 0.47 | 1.92  | 37.80 | 39.78  | 71.82  | 80        |
| 81 | Moscow               | 56  | 38   | 10    |              | 200 | 7   | 706  | 983  | 31 | 6823 | 20523 | 0.47 | 1.92  | 40.00 | 41.02  | 74.06  | 81        |
| 82 | Moscow, Idaho        | 48  | -117 | 15    | Urban forest | 790 | 10  | 760  | 824  | 37 | 223  | 31465 | 0.39 | 3.79  | 37.71 | 84.85  | 107.55 | 82        |
| 83 | Murmansk             | 69  | 33   | 10    | Urban forest | 150 | 4   | 500  | 797  | 37 | 190  | 9674  | 0.42 | -0.46 | 49.70 | 44.73  | 80.76  | 83        |
| 84 | Nanchang             | 29  | 116  | 20    | Urban forest | 25  | 18  | 1700 | 866  | 60 | 1520 | 6467  | 0.38 | 2.81  | 15.02 | 41.76  | 41.76  | 84        |
| 85 | Nanchang             | 29  | 116  | 15    | Urban forest | 25  | 18  | 1700 | 866  | 60 | 1520 | 6467  | 0.38 | 2.81  | 20.49 | 43.03  | 54.54  | 85        |
| 86 | Nanjing              | 32  | 119  | 20    | Urban forest | 21  | 16  | 1091 | 930  | 58 | 2687 | 15062 | 0.31 | 2.83  | 8.40  | 23.18  | 23.18  | 86        |
| 87 | Nanjing              | 32  | 119  | 20    |              | 21  | 16  | 1091 | 930  | 58 | 2687 | 15062 | 0.31 | 2.83  | 13.92 | 38.98  | 38.98  | 87        |
| 88 | Nanjing              | 32  | 119  | 10    | Urban forest | 21  | 16  | 1091 | 930  | 58 | 2687 | 15062 | 0.31 | 2.83  | 15.52 | 21.73  | 39.23  | 88        |
| 89 | Nanjing              | 32  | 119  | 10    | Urban forest | 21  | 16  | 1091 | 930  | 58 | 2687 | 15062 | 0.31 | 2.83  | 17.27 | 23.83  | 43.03  | 89        |
| 90 | New York             | 41  | -74  | 10    | Urban forest | 10  | 13  | 1174 | 893  | 10 | 6041 | 36082 | 0.49 | 4.34  | 61.90 | 37.14  | 67.06  | 90        |
| 91 | New York             | 41  | -74  | 20    | Urban forest | 10  | 13  | 1174 | 893  | 10 | 6041 | 36082 | 0.49 | 4.34  | 59.98 | 111.99 | 111.99 | 91        |
| 92 | New York             | 41  | -74  | 10    | Urban forest | 10  | 13  | 1174 | 893  | 10 | 6041 | 36082 | 0.49 | 4.34  | 53.25 | 46.00  | 83.05  | 15        |
| 93 | New York             | 41  | -74  | 20    | Urban forest | 10  | 13  | 1174 | 893  | 10 | 6041 | 36082 | 0.49 | 4.34  | 52.20 | 91.53  | 91.53  | 92        |
| 94 | New York             | 41  | -74  | 10    | Urban forest | 10  | 13  | 1174 | 893  | 10 | 6041 | 36082 | 0.49 | 4.34  | 42.89 | 25.73  | 46.46  | 93        |

| ID  | City                   | Lat | Lon  | Depth | Vegetation   | Ele  | MAT | MAP  | TS  | PS | PD   | GDPP  | UGI  | UHI   | SOCC  | SOCD  | SOCD20 | Reference |
|-----|------------------------|-----|------|-------|--------------|------|-----|------|-----|----|------|-------|------|-------|-------|-------|--------|-----------|
| 95  | New York               | 41  | -74  | 10    | Urban forest | 10   | 13  | 1174 | 893 | 10 | 6041 | 36082 | 0.49 | 4.34  | 39.00 | 32.76 | 59.15  | 94        |
| 96  | Newark                 | 40  | -74  | 10    | Urban forest | 10   | 13  | 1140 | 861 | 10 | 621  | 28171 | 0.53 | 4.34  | 41.00 | 41.55 | 75.01  | 95        |
| 97  | Ningbo                 | 30  | 122  | 20    | Urban forest | 4    | 16  | 1480 | 827 | 41 | 1830 | 14155 | 0.30 | 4.86  | 33.00 | 83.82 | 83.82  | 96        |
| 98  | Obrenovac              | 44  | 20   | 10    | Urban forest | 117  | 12  | 700  | 764 | 29 | 52   | 4274  | 0.47 | 0.64  | 21.00 | 26.40 | 47.67  | 25        |
| 99  | Pancevo                | 45  | 21   | 10    | Urban forest | 78   | 12  | 700  | 783 | 26 | 106  | 4474  | 0.45 | 0.85  | 30.00 | 34.43 | 62.15  | 25        |
| 100 | Paris                  | 49  | 2    | 10    | Urban forest | 108  | 11  | 600  | 565 | 11 | 4248 | 34274 | 0.43 | 2.64  | 55.60 | 57.82 | 104.40 | 97        |
| 101 | Paris                  | 49  | 2    | 10    | Urban lawn   | 108  | 11  | 600  | 565 | 11 | 4248 | 34274 | 0.43 | 2.64  | 25.10 | 31.88 | 57.55  | 97        |
| 102 | Paris                  | 49  | 2    | 10    | Urban forest | 108  | 11  | 600  | 565 | 11 | 4248 | 34274 | 0.43 | 2.64  | 55.60 | 61.16 | 110.42 | 98        |
| 103 | Philadelphia           | 40  | -75  | 10    | Urban forest | 12   | 13  | 1070 | 903 | 13 | 869  | 36346 | 0.49 | 4.34  | 70.07 | 46.15 | 83.33  | 15        |
| 104 | Philadelphia           | 40  | -75  | 15    | Urban forest | 12   | 13  | 1070 | 903 | 13 | 869  | 36346 | 0.49 | 4.34  | 44.66 | 64.89 | 82.25  | 99        |
| 105 | Phoenix                | 33  | -112 | 10    | Urban lawn   | 355  | 24  | 194  | 781 | 48 | 386  | 32038 | 0.25 | 0.10  | 18.68 | 24.01 | 43.35  | 100       |
| 106 | Phoenix                | 33  | -112 | 20    | Urban forest | 355  | 24  | 194  | 781 | 48 | 386  | 32038 | 0.25 | 0.10  | 10.00 | 24.80 | 24.80  | 101       |
| 107 | Porto                  | 41  | -9   | 20    | Urban forest | 94   | 15  | 1228 | 394 | 54 | 1297 | 13854 | 0.46 | 1.84  | 32.48 | 72.58 | 72.58  | 68        |
| 108 | Potchefstroom          | -27 | 27   | 10    | Urban lawn   | 1100 | 15  | 600  | 464 | 75 | 93   | 7496  | 0.38 | -2.40 | 55.70 | 46.45 | 83.87  | 18        |
| 109 | Coahuila               | 26  | -101 | 15    | Urban forest | 1403 | 16  | 350  | 405 | 60 | 313  | 10873 | 0.20 | 2.94  | 26.10 | 46.79 | 59.30  | 102       |
| 110 | Registro               | -24 | -46  | 10    | Urban forest | 31   | 23  | 1563 | 237 | 41 | 2266 | 7098  | 0.43 | 2.04  | 12.93 | 17.76 | 32.06  | 103       |
| 111 | Salzburg               | 48  | 13   | 20    |              | 436  | 9   | 1169 | 727 | 37 | 174  | 24909 | 0.49 | 3.01  | 41.60 | 83.70 | 83.70  | 24        |
| 112 | San Juan               | 18  | -66  | 10    | Urban forest | 30   | 26  | 1750 | 118 | 27 | 630  | 27938 | 0.44 | 2.32  | 33.10 | 35.42 | 63.94  | 104       |
| 113 | Santiago de Compostela | 42  | -9   | 20    | Urban forest | 260  | 13  | 1787 | 393 | 46 | 440  | 16767 | 0.48 | 1.66  | 44.00 | 80.96 | 80.96  | 105       |
| 114 | Seoul                  | 37  | 127  | 10    | Urban forest | 40   | 13  | 1450 | 998 | 92 | 5060 | 13511 | 0.35 | 1.99  | 20.95 | 23.26 | 41.99  | 106       |
| 115 | Sevilla                | 37  | -6   | 10    | Urban lawn   | 9    | 18  | 540  | 556 | 67 | 381  | 16731 | 0.27 | -0.05 | 27.00 | 31.97 | 57.72  | 107       |
| 116 | Sevilla                | 37  | -6   | 20    |              | 9    | 18  | 540  | 556 | 67 | 381  | 16731 | 0.27 | -0.05 | 20.00 | 50.78 | 50.78  | 14        |
| 117 | Shanghai               | 31  | 121  | 20    | Urban forest | 4    | 16  | 1208 | 856 | 47 | 7658 | 14363 | 0.35 | 5.02  | 12.44 | 32.59 | 32.59  | 108       |
| 118 | Shanghai               | 31  | 121  | 10    | Urban forest | 4    | 16  | 1208 | 856 | 47 | 7658 | 14363 | 0.35 | 5.02  | 12.85 | 16.06 | 29.00  | 109       |
| 119 | Shanghai               | 31  | 121  | 10    | Urban forest | 4    | 16  | 1208 | 856 | 47 | 7658 | 14363 | 0.35 | 5.02  | 13.00 | 17.55 | 31.69  | 110       |
| 120 | Shanghai               | 31  | 121  | 20    | Urban forest | 4    | 16  | 1208 | 856 | 47 | 7658 | 14363 | 0.35 | 5.02  | 18.98 | 53.14 | 53.14  | 111       |



| ID  | City           | Lat | Lon | Depth | Vegetation   | Ele | MAT | MAP  | TS   | PS  | PD   | GDPP  | UGI  | UHI   | SOCC  | SOCD  | SOCD20 | Reference |
|-----|----------------|-----|-----|-------|--------------|-----|-----|------|------|-----|------|-------|------|-------|-------|-------|--------|-----------|
| 121 | Shenyang       | 42  | 123 | 20    | Urban forest | 55  | 8   | 700  | 1292 | 97  | 2701 | 11348 | 0.29 | 5.05  | 30.54 | 67.19 | 67.19  | 112       |
| 122 | Shenzhen       | 23  | 114 | 20    |              | 20  | 22  | 1924 | 540  | 76  | 5063 | 26071 | 0.30 | 1.98  | 9.16  | 23.83 | 23.83  | 113       |
| 123 | Shenzhen       | 23  | 114 | 20    |              | 20  | 22  | 1924 | 540  | 76  | 5063 | 26071 | 0.30 | 1.98  | 14.00 | 37.52 | 37.52  | 114       |
| 124 | Singapore      | 1   | 104 | 10    | Urban lawn   | 20  | 28  | 2166 | 51   | 23  | 5311 | 52383 | 0.49 | 1.91  | 17.80 | 19.58 | 35.35  | 115       |
| 125 | Singapore      | 1   | 104 | 20    | Urban forest | 20  | 28  | 2166 | 51   | 23  | 5311 | 52383 | 0.49 | 1.91  | 15.45 | 33.99 | 33.99  | 116       |
| 126 | Singapore      | 1   | 104 | 10    | Urban forest | 20  | 28  | 2166 | 51   | 23  | 5311 | 52383 | 0.49 | 1.91  | 15.00 | 19.50 | 35.21  | 16        |
| 127 | Smederevo      | 43  | 22  | 10    | Urban forest | 77  | 12  | 700  | 802  | 15  | 79   | 4374  | 0.45 | 0.85  | 26.80 | 31.80 | 57.41  | 25        |
| 128 | Sochi          | 44  | 40  | 10    | Urban lawn   | 26  | 17  | 1361 | 633  | 26  | 114  | 11598 | 0.49 | 2.49  | 53.10 | 45.97 | 82.99  | 65        |
| 129 | Sofia          | 43  | 23  | 20    | Urban forest | 550 | 13  | 630  | 802  | 28  | 483  | 25565 | 0.43 | 3.42  | 25.00 | 60.43 | 60.43  | 117       |
| 130 | Stoke-on-Trent | 53  | -2  | 15    | Urban lawn   | 100 | 10  | 800  | 447  | 13  | 1114 | 16450 | 0.46 | 1.72  | 73.00 | 68.21 | 86.45  | 118       |
| 131 | Strasbourg     | 49  | 8   | 20    | Urban forest | 154 | 11  | 352  | 658  | 28  | 406  | 17734 | 0.45 | 2.15  | 26.10 | 62.39 | 62.39  | 68        |
| 132 | Stuttgart      | 49  | 9   | 20    | Urban forest | 207 | 11  | 665  | 667  | 31  | 1048 | 24532 | 0.49 | 2.65  | 54.10 | 92.35 | 92.35  | 119       |
| 133 | Suwon          | 36  | 129 | 15    |              | 50  | 11  | 1261 | 839  | 66  | 547  | 28777 | 0.27 | 3.52  | 16.03 | 27.89 | 35.35  | 120       |
| 134 | Székesfehérvár | 47  | 18  | 10    | Urban forest | 150 | 10  | 540  | 811  | 25  | 119  | 10238 | 0.46 | 1.22  | 34.11 | 37.43 | 67.58  | 121       |
| 135 | Székesfehérvár | 47  | 18  | 20    | Urban forest | 150 | 10  | 540  | 811  | 25  | 119  | 10238 | 0.46 | 1.22  | 25.12 | 60.63 | 60.63  | 121       |
| 136 | Taiyuan        | 38  | 113 | 20    |              | 800 | 10  | 420  | 1060 | 98  | 1737 | 7161  | 0.25 | 4.37  | 13.38 | 39.34 | 39.34  | 122       |
| 137 | Tel Aviv       | 32  | 35  | 10    |              | 67  | 19  | 530  | 515  | 114 | 3007 | 22261 | 0.30 | -1.96 | 17.05 | 22.26 | 40.18  | 123       |
| 138 | Tel Aviv       | 32  | 35  | 10    | Urban forest | 67  | 19  | 530  | 515  | 114 | 3007 | 22261 | 0.30 | -1.96 | 14.60 | 19.50 | 35.20  | 124       |
| 139 | Tel Aviv       | 32  | 35  | 10    | Urban forest | 67  | 19  | 530  | 515  | 114 | 3007 | 22261 | 0.30 | -1.96 | 10.15 | 14.11 | 25.47  | 125       |
| 140 | Thessaloniki   | 41  | 23  | 20    | Urban forest | 120 | 15  | 352  | 764  | 24  | 457  | 12067 | 0.30 | 0.48  | 14.00 | 42.00 | 42.00  | 126       |
| 141 | Thessaloniki   | 41  | 23  | 20    |              | 120 | 15  | 352  | 764  | 24  | 457  | 12067 | 0.30 | 0.48  | 9.20  | 25.78 | 25.78  | 24        |
| 142 | Tianjin        | 39  | 117 | 20    |              | 10  | 14  | 585  | 1079 | 134 | 3790 | 17505 | 0.30 | 4.55  | 6.28  | 15.83 | 15.83  | 127       |
| 143 | Tianjin        | 39  | 117 | 20    | Urban forest | 10  | 14  | 585  | 1079 | 134 | 3790 | 17505 | 0.30 | 4.55  | 10.10 | 26.26 | 26.26  | 128       |
| 144 | Tokyo          | 36  | 140 | 5     | Urban forest | 40  | 14  | 1600 | 777  | 46  | 8955 | 20901 | 0.33 | 5.61  | 52.90 | 22.96 | 78.66  | 129       |
| 145 | Tokyo          | 36  | 140 | 10    | Urban forest | 40  | 14  | 1600 | 777  | 46  | 8955 | 20901 | 0.33 | 5.61  | 51.80 | 45.66 | 82.44  | 129       |
| 146 | Tokyo          | 36  | 140 | 20    | Urban forest | 40  | 14  | 1600 | 777  | 46  | 8955 | 20901 | 0.33 | 5.61  | 46.50 | 88.00 | 88.00  | 129       |

| ID  | City      | Lat | Lon | Depth | Vegetation   | Ele  | MAT | MAP  | TS   | PS  | PD   | GDPP  | UGI  | UHI   | SOCC  | SOCD   | SOCD20 | Reference |
|-----|-----------|-----|-----|-------|--------------|------|-----|------|------|-----|------|-------|------|-------|-------|--------|--------|-----------|
| 147 | Tokyo     | 36  | 140 | 5     | Urban lawn   | 40   | 14  | 1600 | 777  | 46  | 8955 | 20901 | 0.33 | 5.61  | 55.20 | 23.19  | 79.43  | 129       |
| 148 | Tokyo     | 36  | 140 | 10    | Urban lawn   | 40   | 14  | 1600 | 777  | 46  | 8955 | 20901 | 0.33 | 5.61  | 52.45 | 45.82  | 82.73  | 129       |
| 149 | Tokyo     | 36  | 140 | 20    | Urban lawn   | 40   | 14  | 1600 | 777  | 46  | 8955 | 20901 | 0.33 | 5.61  | 45.83 | 87.48  | 87.48  | 129       |
| 150 | Torreon   | 53  | 19  | 15    |              | 50   | 8   | 535  | 751  | 40  | 201  | 9725  | 0.43 | 2.15  | 30.00 | 51.64  | 65.45  | 76        |
| 151 | Turin     | 45  | 8   | 20    |              | 18   | 17  | 598  | 708  | 38  | 781  | 18845 | 0.43 | 4.17  | 20.50 | 51.80  | 51.80  | 14        |
| 152 | Uppsala   | 60  | 18  | 20    |              | 21   | 7   | 556  | 766  | 29  | 226  | 18817 | 0.46 | 1.94  | 31.00 | 70.39  | 70.39  | 14        |
| 153 | Wulumqi   | 44  | 88  | 20    |              | 800  | 7   | 294  | 1449 | 38  | 1645 | 6710  | 0.27 | 1.71  | 6.00  | 17.28  | 17.28  | 130       |
| 154 | Varanasi  | 25  | 83  | 15    | Urban forest | 76   | 30  | 1000 | 591  | 139 | 1249 | 2828  | 0.40 | 0.02  | 3.60  | 7.51   | 9.51   | 131       |
| 155 | Varanasi  | 25  | 83  | 15    | Urban forest | 76   | 30  | 1000 | 591  | 139 | 1249 | 2828  | 0.40 | 0.02  | 7.90  | 13.27  | 16.82  | 132       |
| 156 | Varanasi  | 25  | 83  | 10    | Urban forest | 76   | 30  | 1000 | 591  | 139 | 1249 | 2828  | 0.40 | 0.02  | 19.90 | 27.68  | 49.98  | 133       |
| 157 | Varanasi  | 25  | 83  | 10    | Urban forest | 76   | 30  | 1000 | 591  | 139 | 1249 | 2828  | 0.40 | 0.02  | 19.40 | 33.17  | 59.89  | 133       |
| 158 | Warsaw    | 52  | 21  | 20    | Urban lawn   | 112  | 9   | 680  | 765  | 36  | 700  | 21183 | 0.48 | 1.50  | 21.70 | 54.20  | 54.20  | 134       |
| 159 | Warsaw    | 52  | 21  | 20    | Urban lawn   | 112  | 9   | 680  | 765  | 36  | 700  | 21183 | 0.48 | 1.50  | 20.50 | 51.80  | 51.80  | 135       |
| 160 | Wuhu      | 31  | 118 | 20    | Urban forest | 15   | 16  | 1200 | 915  | 52  | 853  | 6122  | 0.29 | 2.85  | 11.00 | 30.80  | 30.80  | 136       |
| 161 | Xi'an     | 34  | 109 | 20    |              | 400  | 15  | 545  | 943  | 64  | 2717 | 7566  | 0.29 | 1.72  | 13.59 | 35.88  | 35.88  | 137       |
| 162 | Yan'an    | 37  | 109 | 20    | Urban forest | 1100 | 9   | 500  | 1028 | 92  | 126  | 4771  | 0.33 | 1.53  | 10.48 | 29.04  | 29.04  | 138       |
| 163 | Zhengzhou | 35  | 114 | 10    | Urban forest | 90   | 16  | 690  | 983  | 86  | 2453 | 7263  | 0.27 | 4.53  | 4.27  | 4.87   | 8.79   | 139       |
| 164 | Zurich    | 47  | 9   | 20    |              | 556  | 12  | 550  | 665  | 23  | 706  | 40722 | 0.52 | 2.43  | 50.90 | 107.91 | 107.91 | 140       |
| 165 | Glasgow   | 56  | -4  | 15    | Urban lawn   | 44   | 9   | 900  | 415  | 30  | 821  | 16967 | 0.47 | 2.02  | 55.00 | 69.51  | 88.10  | 118       |
| 166 | Liverpool | 53  | -3  | 15    | Urban lawn   | 50   | 9   | 796  | 445  | 20  | 943  | 16099 | 0.43 | 1.93  | 38.51 | 74.52  | 94.45  | 141       |
| 167 | Knoxville | 36  | -84 | 10    | Urban forest | 298  | 14  | 1602 | 809  | 14  | 125  | 28986 | 0.50 | 3.15  | 33.06 | 45.95  | 82.97  | 142       |
| 168 | Akure     | 7   | 5   | 20    | Urban lawn   | 357  | 27  | 1453 | 117  | 66  | 524  | 5916  | 0.37 | 2.34  | 25.08 | 83.28  | 83.28  | 143       |
| 169 | Okitipupa | 6   | 5   | 20    |              | 32   | 28  | 1719 | 117  | 65  | 295  | 6219  | 0.44 | -0.80 | 22.71 | 79.84  | 79.84  | 143       |
| 170 | Akure     | 7   | 5   | 20    | Urban lawn   | 357  | 27  | 1453 | 117  | 66  | 524  | 5916  | 0.37 | 2.34  | 18.55 | 61.60  | 61.60  | 143       |
| 171 | Okitipupa | 6   | 5   | 20    |              | 32   | 28  | 1719 | 117  | 65  | 295  | 6219  | 0.44 | -0.80 | 18.41 | 66.04  | 66.04  | 143       |
| 172 | Wulumqi   | 44  | 88  | 5     | Urban lawn   | 800  | 7   | 294  | 1449 | 38  | 1645 | 6710  | 0.27 | 1.71  | 18.13 | 11.72  | 40.13  | 144       |

| ID  | City                   | Lat | Lon | Depth | Vegetation   | Ele | MAT | MAP  | TS  | PS | PD   | GDPP  | UGI  | UHI  | SOCC  | SOCD  | SOCD20 | Reference |
|-----|------------------------|-----|-----|-------|--------------|-----|-----|------|-----|----|------|-------|------|------|-------|-------|--------|-----------|
| 173 | Peshawar               | 34  | 72  | 15    |              | 170 | 25  | 428  | 817 | 57 | 977  | 4277  | 0.30 | 0.47 | 32.50 | 54.45 | 69.02  | 145       |
| 174 | Ancona                 | 44  | 14  | 5     |              | 152 | 14  | 1111 | 651 | 20 | 852  | 13254 | 0.40 | 1.02 | 34.35 | 18.80 | 64.40  | 146       |
| 175 | Guangzhou              | 22  | 113 | 20    |              | 22  | 21  | 1720 | 539 | 74 | 5063 | 22218 | 0.43 | 1.98 | 9.12  | 24.10 | 24.10  | 147       |
| 176 | Guangzhou              | 22  | 113 | 20    |              | 22  | 21  | 1720 | 539 | 74 | 5063 | 22218 | 0.43 | 1.98 | 10.43 | 27.50 | 27.50  | 147       |
| 177 | Piracicaba             | -23 | -48 | 5     |              | 132 | 28  | 913  | 256 | 72 | 194  | 374   | 0.43 | 1.77 | 25.00 | 15.11 | 51.75  | 148       |
| 178 | Santo Amaro            | -13 | -39 | 5     |              | 364 | 23  | 739  | 140 | 42 | 288  | 10175 | 0.41 | 1.27 | 25.00 | 15.11 | 51.75  | 148       |
| 179 | Río Piedras [San Juan] | 18  | -66 | 10    | Urban forest | 82  | 24  | 1972 | 118 | 27 | 630  | 27938 | 0.44 | 2.32 | 34.00 | 34.00 | 61.39  | 149       |
| 180 | Vilnius                | 55  | 25  | 5     | Urban forest | 130 | 9   | 735  | 835 | 27 | 331  | 21361 | 0.47 | 1.56 | 35.34 | 19.13 | 65.52  | 150       |
| 181 | Glasgow                | 56  | -4  | 10    |              | 44  | 9   | 900  | 415 | 30 | 821  | 16967 | 0.47 | 2.02 | 63.80 | 46.90 | 84.68  | 151       |
| 182 | Glasgow                | 56  | -4  | 20    |              | 44  | 9   | 900  | 415 | 30 | 821  | 16967 | 0.47 | 2.02 | 57.13 | 93.29 | 93.29  | 151       |
| 183 | Aveiro                 | 40  | -8  | 10    |              | 16  | 18  | 1000 | 438 | 51 | 114  | 12720 | 0.38 | 1.45 | 9.28  | 12.99 | 23.46  | 151       |
| 184 | Aveiro                 | 40  | -8  | 20    |              | 16  | 18  | 1000 | 438 | 51 | 114  | 12720 | 0.38 | 1.45 | 8.27  | 23.35 | 23.35  | 151       |
| 185 | Uppsala                | 60  | 18  | 20    | Urban lawn   | 21  | 7   | 556  | 766 | 29 | 226  | 18817 | 0.46 | 1.94 | 39.45 | 89.94 | 89.94  | 152       |
| 186 | Malmö                  | 56  | 13  | 20    | Urban lawn   | 9   | 8   | 540  | 642 | 19 | 303  | 17839 | 0.42 | 1.30 | 32.53 | 67.01 | 67.01  | 152       |
| 187 | Gothenburg             | 58  | 12  | 20    | Urban lawn   | 34  | 7   | 714  | 671 | 20 | 611  | 19410 | 0.45 | 1.20 | 40.87 | 75.20 | 75.20  | 152       |
| 188 | Santiago de Compostela | 42  | -9  | 10    | Urban forest | 260 | 13  | 1787 | 393 | 46 | 440  | 16767 | 0.48 | 1.66 | 34.80 | 37.90 | 68.42  | 153       |
| 189 | Santiago de Compostela | 42  | -9  | 10    | Urban lawn   | 260 | 13  | 1787 | 393 | 46 | 440  | 16767 | 0.48 | 1.66 | 31.29 | 35.41 | 63.93  | 153       |
| 190 | Székesfehérvár         | 47  | 18  | 10    | Urban forest | 200 | 10  | 540  | 811 | 25 | 119  | 10238 | 0.46 | 1.22 | 58.80 | 46.81 | 84.52  | 121       |
| 191 | Székesfehérvár         | 47  | 18  | 20    | Urban forest | 200 | 10  | 540  | 811 | 25 | 119  | 10238 | 0.46 | 1.22 | 51.05 | 90.94 | 90.94  | 121       |
| 192 | Székesfehérvár         | 47  | 18  | 10    |              | 200 | 10  | 540  | 811 | 25 | 119  | 10238 | 0.46 | 1.22 | 39.90 | 40.97 | 73.96  | 121       |
| 193 | Székesfehérvár         | 47  | 18  | 20    |              | 200 | 10  | 540  | 811 | 25 | 119  | 10238 | 0.46 | 1.22 | 39.65 | 81.66 | 81.66  | 121       |
| 194 | Székesfehérvár         | 47  | 18  | 10    |              | 200 | 10  | 540  | 811 | 25 | 119  | 10238 | 0.46 | 1.22 | 65.20 | 46.82 | 84.53  | 121       |
| 195 | Székesfehérvár         | 47  | 18  | 20    |              | 200 | 10  | 540  | 811 | 25 | 119  | 10238 | 0.46 | 1.22 | 55.30 | 92.78 | 92.78  | 121       |
| 196 | Atlanta                | 34  | -84 | 20    |              | 304 | 17  | 1416 | 748 | 15 | 983  | 32075 | 0.52 | 3.24 | 44.70 | 86.55 | 86.55  | 154       |
| 197 | Camden                 | 40  | -75 | 20    |              | 3   | 13  | 1100 | 897 | 13 | 869  | 36346 | 0.49 | 4.34 | 73.00 | 90.94 | 90.94  | 154       |
| 198 | Cincinnati             | 39  | -84 | 20    |              | 221 | 12  | 1100 | 933 | 17 | 404  | 29811 | 0.51 | 3.08 | 42.60 | 84.67 | 84.67  | 154       |

| ID  | City                   | Lat | Lon  | Depth | Vegetation   | Ele  | MAT | MAP  | TS   | PS  | PD   | GDPP  | UGI  | UHI  | SOCC  | SOCD  | SOCD20 | Reference |
|-----|------------------------|-----|------|-------|--------------|------|-----|------|------|-----|------|-------|------|------|-------|-------|--------|-----------|
| 199 | Cleveland              | 41  | -82  | 20    |              | 246  | 10  | 979  | 950  | 18  | 565  | 30779 | 0.51 | 3.76 | 31.20 | 70.69 | 70.69  | 154       |
| 200 | Detroit                | 42  | -83  | 20    |              | 203  | 10  | 881  | 995  | 19  | 875  | 29087 | 0.51 | 4.35 | 31.30 | 70.84 | 70.84  | 154       |
| 201 | New Orleans            | 30  | -90  | 20    |              | 3    | 21  | 1645 | 616  | 16  | 246  | 34816 | 0.43 | 1.47 | 26.80 | 63.60 | 63.60  | 154       |
| 202 | Omaha                  | 41  | -96  | 20    |              | 343  | 11  | 777  | 1105 | 53  | 229  | 33067 | 0.50 | 1.84 | 42.90 | 84.95 | 84.95  | 154       |
| 203 | Phoenix                | 33  | -112 | 20    |              | 355  | 24  | 194  | 781  | 48  | 386  | 32038 | 0.25 | 0.10 | 25.50 | 61.32 | 61.32  | 154       |
| 204 | Portland               | 46  | -123 | 20    |              | 70   | 12  | 1162 | 583  | 59  | 551  | 28792 | 0.49 | 4.07 | 48.00 | 89.08 | 89.08  | 154       |
| 205 | Río Piedras [San Juan] | 18  | -66  | 20    |              | 33   | 24  | 1972 | 118  | 27  | 630  | 27938 | 0.44 | 2.32 | 66.20 | 93.46 | 93.46  | 154       |
| 206 | Tacoma                 | 47  | -122 | 20    |              | 75   | 11  | 1233 | 506  | 59  | 689  | 32540 | 0.51 | 4.32 | 68.30 | 92.92 | 92.92  | 154       |
| 207 | Panzhuhua              | 27  | 102  | 20    |              | 1174 | 18  | 996  | 485  | 94  | 316  | 12229 | 0.37 | 2.98 | 14.00 | 37.60 | 37.60  | 155       |
| 208 | Wroclaw                | 51  | 17   | 20    | Urban lawn   | 125  | 10  | 548  | 731  | 43  | 259  | 10798 | 0.50 | 1.69 | 34.70 | 75.66 | 75.66  | 156       |
| 209 | Caserta                | 41  | 14   | 5     | Urban forest | 46   | 10  | 938  | 612  | 44  | 267  | 20888 | 0.42 | 4.34 | 63.29 | 23.46 | 80.37  | 157       |
| 210 | Wuhan                  | 31  | 114  | 10    | Urban lawn   | 7    | 16  | 1100 | 899  | 53  | 3228 | 18686 | 0.35 | 2.51 | 11.30 | 15.54 | 28.07  | 158       |
| 211 | Campinas               | -23 | -47  | 10    | Urban forest | 754  | 21  | 1462 | 229  | 67  | 1007 | 17644 | 0.36 | 4.44 | 27.80 | 32.65 | 58.94  | 159       |
| 212 | Campinas               | -23 | -47  | 20    | Urban forest | 754  | 21  | 1462 | 229  | 67  | 1007 | 17644 | 0.36 | 4.44 | 23.90 | 58.41 | 58.41  | 159       |
| 213 | Naples [Italy]         | 41  | 14   | 5     |              | 5    | 15  | 908  | 605  | 49  | 2830 | 20421 | 0.39 | 2.51 | 45.53 | 15.50 | 53.11  | 160       |
| 214 | Philadelphia           | 40  | -75  | 10    | Urban forest | 32   | 13  | 1239 | 903  | 13  | 869  | 36346 | 0.49 | 4.34 | 80.04 | 42.98 | 77.60  | 161       |
| 215 | Newark                 | 40  | -74  | 10    | Urban forest | 10   | 13  | 1140 | 861  | 10  | 621  | 28171 | 0.53 | 4.34 | 44.66 | 50.91 | 91.92  | 161       |
| 216 | Bobo-Dioulasso         | 11  | -4   | 15    |              | 450  | 27  | 1050 | 181  | 106 | 292  | 1191  | 0.33 | 1.76 | 19.00 | 36.53 | 46.30  | 162       |
| 217 | Hartford               | 42  | -73  | 10    | Urban lawn   | 37   | 23  | 840  | 939  | 6   | 477  | 45003 | 0.52 | 4.34 | 24.91 | 28.90 | 52.18  | 163       |
| 218 | Hartford               | 42  | -73  | 20    | Urban lawn   | 37   | 23  | 840  | 939  | 6   | 477  | 45003 | 0.52 | 4.34 | 19.39 | 47.30 | 47.30  | 163       |
| 219 | Brno                   | 49  | 17   | 10    | Urban lawn   | 241  | 10  | 552  | 769  | 45  | 296  | 14718 | 0.44 | 1.80 | 63.50 | 46.91 | 84.70  | 164       |
| 220 | Edmonton               | 54  | -113 | 15    | Urban lawn   | 675  | 4   | 348  | 1116 | 71  | 256  | 28849 | 0.39 | 1.58 | 43.00 | 63.78 | 80.84  | 165       |
| 221 | Estarreja              | 41  | -9   | 20    |              | 24   | 16  | 1295 | 375  | 55  | 349  | 12720 | 0.38 | 1.03 | 21.70 | 54.20 | 54.20  | 166       |
| 222 | Viseu                  | 41  | -8   | 20    |              | 459  | 14  | 1251 | 501  | 59  | 80   | 12720 | 0.38 | 1.03 | 32.20 | 72.17 | 72.17  | 166       |
| 223 | Lisbon                 | 39  | -9   | 20    |              | 86   | 18  | 877  | 405  | 63  | 1569 | 24257 | 0.36 | 1.72 | 57.60 | 93.40 | 93.40  | 166       |
| 224 | Estarreja              | 41  | -9   | 20    |              | 24   | 16  | 1295 | 375  | 55  | 349  | 12720 | 0.38 | 1.03 | 27.40 | 64.62 | 64.62  | 166       |

| ID  | City           | Lat | Lon  | Depth | Vegetation   | Ele  | MAT | MAP  | TS   | PS  | PD   | GDPP  | UGI  | UHI   | SOCC  | SOCD  | SOCD20 | Reference |
|-----|----------------|-----|------|-------|--------------|------|-----|------|------|-----|------|-------|------|-------|-------|-------|--------|-----------|
| 225 | Viseu          | 41  | -8   | 20    |              | 459  | 14  | 1251 | 501  | 59  | 80   | 12720 | 0.38 | 1.03  | 15.20 | 40.37 | 40.37  | 166       |
| 226 | Lisbon         | 39  | -9   | 20    |              | 86   | 18  | 877  | 405  | 63  | 1569 | 24257 | 0.36 | 1.72  | 39.90 | 81.93 | 81.93  | 166       |
| 227 | Novi Sad       | 45  | 20   | 10    |              | 82   | 13  | 643  | 783  | 30  | 230  | 3098  | 0.47 | 1.33  | 40.02 | 41.03 | 74.08  | 167       |
| 228 | Novi Sad       | 45  | 20   | 10    |              | 82   | 13  | 643  | 783  | 30  | 230  | 3098  | 0.47 | 1.33  | 42.69 | 42.38 | 76.51  | 167       |
| 229 | Salt Lake City | 41  | -112 | 10    | Urban lawn   | 1363 | 11  | 397  | 949  | 31  | 465  | 26379 | 0.40 | 3.90  | 27.00 | 25.60 | 46.21  | 168       |
| 230 | Salt Lake City | 41  | -112 | 20    | Urban lawn   | 1363 | 11  | 397  | 949  | 31  | 465  | 26379 | 0.40 | 3.90  | 23.50 | 57.34 | 57.34  | 168       |
| 231 | Lubbock        | 34  | -102 | 10    | Urban lawn   | 987  | 16  | 487  | 828  | 58  | 110  | 33476 | 0.35 | -0.07 | 21.11 | 26.18 | 47.27  | 169       |
| 232 | Budapest       | 47  | 19   | 10    | Urban lawn   | 130  | 12  | 516  | 781  | 25  | 557  | 27860 | 0.45 | 1.97  | 25.40 | 30.57 | 55.20  | 170       |
| 233 | Beijing        | 40  | 116  | 10    | Urban forest | 51   | 12  | 640  | 1098 | 133 | 6609 | 16241 | 0.33 | 4.90  | 8.10  | 11.46 | 20.69  | 171       |
| 234 | Beijing        | 40  | 116  | 20    | Urban forest | 51   | 12  | 640  | 1098 | 133 | 6609 | 16241 | 0.33 | 4.90  | 7.56  | 21.49 | 21.49  | 171       |
| 235 | Anji           | 31  | 120  | 10    | Urban forest | 24   | 14  | 1500 | 905  | 51  | 381  | 10432 | 0.34 | 2.12  | 14.80 | 18.35 | 33.13  | 172       |
| 236 | Shanghai       | 31  | 121  | 20    |              | 4    | 16  | 1208 | 856  | 47  | 7658 | 14363 | 0.35 | 5.02  | 16.82 | 44.01 | 44.01  | 173       |
| 237 | Brisbane       | -27 | 153  | 15    | Urban lawn   | 60   | 19  | 1110 | 374  | 60  | 797  | 29333 | 0.42 | 2.31  | 15.00 | 31.50 | 39.92  | 174       |
| 238 | Tonghua        | 42  | 126  | 5     | Urban forest | 394  | 5   | 874  | 1344 | 97  | 233  | 6001  | 0.35 | 1.70  | 91.35 | 18.23 | 62.44  | 175       |
| 239 | Baishan        | 42  | 126  | 5     | Urban lawn   | 494  | 3   | 753  | 1347 | 96  | 230  | 7600  | 0.28 | 2.46  | 21.21 | 13.31 | 45.59  | 175       |
| 240 | Yanji          | 43  | 129  | 5     | Urban forest | 204  | 6   | 550  | 1283 | 96  | 167  | 8484  | 0.31 | 3.68  | 22.96 | 14.16 | 48.51  | 175       |
| 241 | Dunhua         | 43  | 128  | 5     | Urban forest | 511  | 4   | 628  | 1327 | 98  | 133  | 6898  | 0.32 | 2.55  | 61.74 | 23.47 | 80.40  | 175       |
| 242 | Jilin          | 44  | 127  | 5     | Urban forest | 201  | 4   | 678  | 1426 | 102 | 793  | 7609  | 0.35 | 3.44  | 35.21 | 19.08 | 65.37  | 175       |
| 243 | Santiago       | -33 | -71  | 5     | Urban forest | 115  | 15  | 491  | 476  | 102 | 1278 | 5013  | 0.31 | 0.96  | 28.24 | 16.50 | 56.54  | 175       |
| 244 | Belo Horizonte | -20 | -44  | 5     | Urban lawn   | 721  | 21  | 1504 | 185  | 87  | 735  | 13039 | 0.36 | 2.63  | 21.11 | 13.26 | 45.42  | 175       |
| 245 | Contagem       | -20 | -44  | 5     | Urban forest | 858  | 21  | 1577 | 184  | 88  | 735  | 13039 | 0.43 | 2.63  | 28.12 | 16.45 | 56.37  | 175       |
| 246 | Betim          | -20 | -44  | 5     | Urban lawn   | 830  | 21  | 1511 | 190  | 87  | 735  | 11111 | 0.36 | 2.63  | 12.55 | 8.53  | 29.23  | 175       |
| 247 | Longmont       | 40  | -105 | 5     | Urban lawn   | 1531 | 10  | 428  | 877  | 47  | 162  | 30760 | 0.42 | 4.96  | 44.71 | 21.64 | 74.14  | 175       |
| 248 | Grand Junction | 39  | -109 | 5     | Urban lawn   | 1423 | 11  | 231  | 981  | 25  | 51   | 34131 | 0.37 | 0.03  | 13.90 | 9.34  | 32.00  | 175       |
| 249 | Cheyenne       | 41  | -105 | 5     | Urban lawn   | 1852 | 8   | 389  | 849  | 57  | 40   | 35042 | 0.39 | -0.49 | 21.38 | 13.39 | 45.88  | 175       |
| 250 | South Lyon     | 42  | -84  | 5     | Urban lawn   | 283  | 9   | 814  | 998  | 20  | 217  | 29087 | 0.51 | 4.35  | 23.93 | 14.61 | 50.07  | 175       |

| ID  | City          | Lat | Lon  | Depth | Vegetation   | Ele  | MAT | MAP  | TS   | PS  | PD   | GDPP  | UGI  | UHI   | SOCC   | SOCD  | SOCD20 | Reference |
|-----|---------------|-----|------|-------|--------------|------|-----|------|------|-----|------|-------|------|-------|--------|-------|--------|-----------|
| 251 | Oxford        | 52  | -1   | 5     | Urban lawn   | 72   | 6   | 573  | 766  | 29  | 226  | 27175 | 0.49 | 1.94  | 101.19 | 14.12 | 48.36  | 175       |
| 252 | Bodø          | 67  | 14   | 5     | Urban lawn   | 8    | 2   | 1537 | 554  | 30  | 14   | 20056 | 0.51 | 0.55  | 65.41  | 23.40 | 80.17  | 175       |
| 253 | Uppsala       | 60  | 18   | 5     | Urban lawn   | 21   | 7   | 556  | 766  | 29  | 226  | 18817 | 0.46 | 1.94  | 79.46  | 21.62 | 74.05  | 175       |
| 254 | Poitiers      | 47  | 0    | 5     | Urban forest | 111  | 12  | 693  | 556  | 17  | 121  | 15507 | 0.49 | 2.02  | 44.50  | 21.59 | 73.98  | 175       |
| 255 | Niort         | 46  | 0    | 5     | Urban forest | 40   | 12  | 825  | 551  | 26  | 80   | 15507 | 0.49 | 0.79  | 41.76  | 20.96 | 71.82  | 175       |
| 256 | Tours         | 47  | 1    | 5     | Urban forest | 73   | 12  | 661  | 552  | 15  | 210  | 16001 | 0.45 | 1.51  | 20.10  | 12.74 | 43.66  | 175       |
| 257 | Ljubljana     | 46  | 15   | 5     | Urban forest | 302  | 10  | 1452 | 768  | 25  | 161  | 22088 | 0.47 | 3.94  | 38.43  | 20.07 | 68.77  | 175       |
| 258 | Koper         | 46  | 14   | 5     | Urban forest | 11   | 14  | 977  | 705  | 23  | 286  | 7369  | 0.24 | 0.54  | 57.74  | 23.36 | 80.02  | 175       |
| 259 | Maribor       | 47  | 16   | 5     | Urban forest | 273  | 10  | 1045 | 743  | 31  | 147  | 12078 | 0.44 | 1.94  | 34.75  | 18.93 | 64.85  | 175       |
| 260 | Pretoria      | -26 | 28   | 5     | Urban forest | 1365 | 18  | 708  | 392  | 82  | 1213 | 10100 | 0.41 | 0.14  | 33.33  | 18.45 | 63.19  | 175       |
| 261 | Germiston     | -26 | 28   | 5     | Urban lawn   | 1644 | 16  | 725  | 403  | 79  | 1879 | 10915 | 0.39 | 0.14  | 31.07  | 17.62 | 60.37  | 175       |
| 262 | Cape Town     | -34 | 18   | 5     | Urban forest | 48   | 17  | 538  | 292  | 68  | 782  | 8001  | 0.35 | 0.45  | 57.86  | 23.36 | 80.04  | 175       |
| 263 | Durgapur      | 24  | 87   | 5     | Urban forest | 585  | 26  | 1298 | 446  | 105 | 809  | 5310  | 0.41 | -0.30 | 12.69  | 8.62  | 29.54  | 175       |
| 264 | Mirzapur      | 25  | 83   | 5     | Urban lawn   | 309  | 26  | 974  | 603  | 145 | 1851 | 4021  | 0.43 | 0.71  | 29.42  | 16.98 | 58.18  | 175       |
| 265 | Agra          | 27  | 78   | 5     | Urban lawn   | 1584 | 26  | 802  | 684  | 131 | 1558 | 3023  | 0.48 | -3.75 | 10.87  | 7.51  | 25.72  | 175       |
| 266 | Beijing       | 40  | 116  | 5     | Urban forest | 51   | 12  | 640  | 1098 | 133 | 6609 | 16241 | 0.33 | 4.90  | 12.20  | 8.33  | 28.52  | 175       |
| 267 | Tai'an        | 36  | 117  | 5     | Urban forest | 80   | 12  | 544  | 1043 | 111 | 510  | 5966  | 0.35 | 2.71  | 11.18  | 7.70  | 26.37  | 175       |
| 268 | Tianjin       | 39  | 117  | 5     | Urban forest | 6    | 13  | 576  | 1079 | 134 | 3790 | 17505 | 0.30 | 4.55  | 16.53  | 10.84 | 37.14  | 175       |
| 269 | Wulumqi       | 44  | 88   | 5     | Urban lawn   | 800  | 7   | 210  | 1449 | 38  | 1645 | 6710  | 0.27 | 1.71  | 55.12  | 23.18 | 79.41  | 175       |
| 270 | Alice Springs | -24 | 134  | 5     | Urban forest | 562  | 21  | 329  | 626  | 50  | 11   | 23527 | 0.44 | -0.83 | 15.66  | 10.36 | 35.48  | 175       |
| 271 | Brisbane      | -27 | 153  | 5     | Urban lawn   | 34   | 21  | 1190 | 374  | 60  | 797  | 29333 | 0.42 | 4.08  | 69.68  | 23.11 | 79.18  | 175       |
| 272 | Mildura       | -34 | 142  | 5     | Urban lawn   | 60   | 17  | 301  | 535  | 15  | 24   | 25729 | 0.34 | -3.55 | 35.83  | 19.28 | 66.06  | 175       |
| 273 | Sydney        | -34 | 151  | 5     | Urban lawn   | 48   | 17  | 910  | 429  | 30  | 596  | 30159 | 0.43 | 5.08  | 47.77  | 22.23 | 76.15  | 175       |
| 274 | Barcelona     | 41  | 2    | 5     | Urban forest | 32   | 16  | 653  | 512  | 32  | 6792 | 14085 | 0.28 | 2.46  | 27.25  | 16.09 | 55.13  | 175       |
| 275 | Pullman       | 47  | -117 | 5     | Urban forest | 717  | 9   | 531  | 745  | 38  | 25   | 31465 | 0.39 | 0.77  | 35.11  | 19.05 | 65.26  | 175       |
| 276 | Mexico City   | 19  | -99  | 5     | Urban forest | 2316 | 15  | 867  | 182  | 94  | 3532 | 18488 | 0.26 | 7.40  | 44.80  | 21.66 | 74.20  | 175       |

| ID  | City        | Lat | Lon | Depth | Vegetation   | Ele  | MAT | MAP  | TS  | PS  | PD   | GDPP  | UGI  | UHI   | SOCC  | SOCD  | SOCD20 | Reference |
|-----|-------------|-----|-----|-------|--------------|------|-----|------|-----|-----|------|-------|------|-------|-------|-------|--------|-----------|
| 277 | Mexico City | 19  | -99 | 5     | Urban forest | 2316 | 16  | 796  | 182 | 94  | 3532 | 18488 | 0.26 | 7.40  | 56.48 | 23.28 | 79.76  | 175       |
| 278 | Madrid      | 40  | -4  | 5     | Urban forest | 41   | 15  | 428  | 667 | 40  | 1722 | 20550 | 0.21 | 2.15  | 21.08 | 13.24 | 45.36  | 175       |
| 279 | Imessa Odo  | 8   | 5   | 5     | Urban forest | 270  | 25  | 1321 | 118 | 66  | 770  | 3387  | 0.40 | 3.44  | 6.36  | 4.56  | 15.63  | 175       |
| 280 | Imessa Odo  | 8   | 5   | 5     | Urban forest | 270  | 26  | 1371 | 118 | 66  | 770  | 3387  | 0.40 | 3.44  | 17.94 | 11.61 | 39.78  | 175       |
| 281 | Imessa Odo  | 7   | 5   | 5     | Urban forest | 270  | 26  | 1399 | 118 | 66  | 482  | 3387  | 0.40 | 3.44  | 9.86  | 6.87  | 23.52  | 175       |
| 282 | Lakeland    | 28  | -82 | 5     | Urban forest | 55   | 22  | 1269 | 448 | 53  | 209  | 33240 | 0.50 | 1.56  | 20.68 | 13.04 | 44.67  | 175       |
| 283 | Utrera      | 37  | -6  | 5     | Urban forest | 49   | 18  | 580  | 571 | 67  | 381  | 4062  | 0.21 | 1.62  | 7.56  | 5.37  | 18.40  | 175       |
| 284 | Coimbra     | 40  | -8  | 5     | Urban forest | 75   | 16  | 934  | 438 | 52  | 114  | 12720 | 0.38 | 1.45  | 7.37  | 5.25  | 17.98  | 175       |
| 285 | Porto       | 41  | -9  | 5     | Urban forest | 83   | 15  | 1228 | 394 | 54  | 1297 | 13854 | 0.46 | 1.84  | 33.86 | 18.63 | 63.82  | 175       |
| 286 | Jerusalem   | 32  | 35  | 5     | Urban forest | 730  | 16  | 439  | 586 | 109 | 972  | 11836 | 0.24 | -1.96 | 58.37 | 23.39 | 80.13  | 175       |
| 287 | Beer Sheva  | 31  | 35  | 5     | Urban forest | 260  | 19  | 216  | 562 | 105 | 160  | 22268 | 0.19 | -1.96 | 18.37 | 11.84 | 40.58  | 175       |
| 288 | Ofakim      | 31  | 35  | 5     | Urban forest | 149  | 20  | 245  | 543 | 107 | 160  | 17927 | 0.27 | -1.96 | 14.79 | 9.86  | 33.78  | 175       |
| 289 | Ningbo      | 30  | 122 | 10    |              | 6    | 17  | 1569 | 827 | 41  | 1830 | 14155 | 0.30 | 4.86  | 15.40 | 19.25 | 34.76  | 176       |
| 290 | Nanjing     | 32  | 119 | 10    | Urban forest | 21   | 16  | 1091 | 930 | 58  | 2687 | 15062 | 0.31 | 2.83  | 15.90 | 20.98 | 37.88  | 177       |
| 291 | Nanjing     | 32  | 119 | 20    | Urban forest | 21   | 16  | 1091 | 930 | 58  | 2687 | 15062 | 0.31 | 2.83  | 13.00 | 35.23 | 35.23  | 177       |
| 292 | Yancheng    | 33  | 120 | 5     | Urban forest | 3    | 14  | 1051 | 931 | 71  | 655  | 16753 | 0.34 | 3.26  | 12.78 | 8.68  | 29.73  | 178       |
| 293 | Yancheng    | 33  | 120 | 5     | Urban lawn   | 3    | 14  | 1051 | 931 | 71  | 655  | 16753 | 0.34 | 3.26  | 15.31 | 10.16 | 34.80  | 178       |
| 294 | Yancheng    | 33  | 120 | 5     | Urban lawn   | 3    | 14  | 1051 | 931 | 71  | 655  | 16753 | 0.34 | 3.26  | 14.44 | 9.66  | 33.08  | 178       |
| 295 | Mendoza     | -33 | -69 | 20    | Urban forest | 772  | 17  | 188  | 599 | 67  | 304  | 13732 | 0.25 | -1.46 | 19.14 | 49.00 | 49.00  | 179       |
| 296 | Xiamen      | 25  | 118 | 10    | Urban forest | 24   | 21  | 1137 | 598 | 59  | 1855 | 13116 | 0.30 | 3.26  | 15.24 | 20.23 | 36.53  | 180       |
| 297 | Xiamen      | 25  | 118 | 10    | Urban lawn   | 24   | 21  | 1137 | 598 | 59  | 1855 | 13116 | 0.30 | 3.26  | 15.74 | 20.80 | 37.56  | 180       |
| 298 | Sosnowiec   | 50  | 19  | 20    | Urban forest | 272  | 9   | 812  | 756 | 40  | 645  | 10596 | 0.51 | 2.12  | 32.00 | 71.88 | 71.88  | 181       |
| 299 | Changsha    | 28  | 113 | 20    | Urban forest | 58   | 17  | 1448 | 869 | 48  | 897  | 10579 | 0.31 | 0.42  | 13.10 | 35.47 | 35.47  | 182       |
| 300 | Changsha    | 28  | 113 | 20    | Urban lawn   | 58   | 17  | 1448 | 869 | 48  | 897  | 10579 | 0.31 | 0.42  | 11.80 | 32.32 | 32.32  | 182       |
| 301 | Hong Kong   | 22  | 114 | 5     | Urban lawn   | 65   | 23  | 2147 | 540 | 76  | 8243 | 43639 | 0.37 | 1.98  | 24.66 | 14.95 | 51.22  | 183       |
| 302 | Hong Kong   | 22  | 114 | 10    | Urban lawn   | 65   | 23  | 2147 | 540 | 76  | 8243 | 43639 | 0.37 | 1.98  | 18.34 | 23.65 | 42.71  | 183       |

| ID  | City          | Lat | Lon | Depth | Vegetation   | Ele | MAT | MAP  | TS   | PS  | PD   | GDPP  | UGI  | UHI  | SOCC  | SOCD  | SOCD20 | Reference |
|-----|---------------|-----|-----|-------|--------------|-----|-----|------|------|-----|------|-------|------|------|-------|-------|--------|-----------|
| 303 | Hong Kong     | 22  | 114 | 15    | Urban lawn   | 65  | 23  | 2147 | 540  | 76  | 8243 | 43639 | 0.37 | 1.98 | 14.65 | 26.36 | 33.41  | 183       |
| 304 | Baltimore     | 39  | -77 | 10    | Urban forest | 70  | 13  | 1154 | 897  | 11  | 939  | 32721 | 0.47 | 2.86 | 44.20 | 43.06 | 77.75  | 46        |
| 305 | Baltimore     | 39  | -77 | 10    | Urban lawn   | 70  | 13  | 1154 | 897  | 11  | 939  | 32721 | 0.47 | 2.86 | 32.50 | 36.30 | 65.54  | 46        |
| 306 | Baltimore     | 39  | -77 | 10    | Urban forest | 70  | 13  | 1154 | 897  | 11  | 939  | 32721 | 0.47 | 2.86 | 43.67 | 46.72 | 84.36  | 184       |
| 307 | Baltimore     | 39  | -77 | 10    | Urban lawn   | 70  | 13  | 1154 | 897  | 11  | 939  | 32721 | 0.47 | 2.86 | 46.00 | 50.60 | 91.36  | 184       |
| 308 | Padang        | -1  | 100 | 20    |              | 44  | 29  | 3552 | 28   | 20  | 508  | 5496  | 0.47 | 3.27 | 26.80 | 48.78 | 48.78  | 185       |
| 309 | Tangshan      | 40  | 118 | 20    |              | 31  | 12  | 600  | 1111 | 126 | 1224 | 8567  | 0.36 | 2.09 | 11.98 | 35.69 | 35.69  | 186       |
| 310 | Xuzhou        | 34  | 117 | 20    |              | 43  | 15  | 841  | 986  | 90  | 1008 | 14540 | 0.36 | 2.46 | 22.38 | 56.40 | 56.40  | 187       |
| 311 | Hengshui      | 38  | 116 | 20    |              | 22  | 14  | 546  | 1129 | 121 | 557  | 7330  | 0.30 | 1.55 | 12.09 | 33.62 | 33.62  | 188       |
| 312 | Qiqihar       | 47  | 124 | 20    |              | 146 | 3   | 415  | 1497 | 115 | 534  | 5771  | 0.30 | 3.46 | 9.85  | 26.41 | 26.41  | 189       |
| 313 | Khartoum      | 16  | 33  | 20    |              | 382 | 30  | 113  | 412  | 153 | 491  | 2220  | 0.15 | 2.44 | 6.70  | 23.58 | 23.58  | 190       |
| 314 | Yilan         | 25  | 122 | 15    |              | 11  | 22  | 2700 | 450  | 29  | 583  | 23143 | 0.36 | 6.74 | 17.70 | 34.45 | 43.66  | 191       |
| 315 | Taipei        | 25  | 121 | 15    |              | 100 | 22  | 2100 | 509  | 29  | 4482 | 34497 | 0.32 | 3.81 | 18.13 | 35.14 | 44.54  | 191       |
| 316 | Kaohsiung     | 23  | 120 | 15    |              | 15  | 24  | 1700 | 376  | 106 | 2295 | 35055 | 0.32 | 3.81 | 4.10  | 9.00  | 11.41  | 191       |
| 317 | Edinburgh     | 56  | -3  | 20    |              | 59  | 8   | 962  | 410  | 14  | 399  | 17083 | 0.46 | 2.02 | 63.16 | 93.85 | 93.85  | 192       |
| 318 | Leeds         | 54  | -2  | 20    |              | 111 | 9   | 1138 | 457  | 17  | 1102 | 15762 | 0.48 | 2.15 | 79.93 | 86.06 | 86.06  | 192       |
| 319 | Liverpool     | 53  | -3  | 20    |              | 35  | 10  | 955  | 445  | 20  | 943  | 16099 | 0.43 | 1.93 | 56.25 | 93.07 | 93.07  | 192       |
| 320 | Nottingham    | 53  | -1  | 20    |              | 56  | 10  | 757  | 474  | 11  | 1016 | 16931 | 0.44 | 2.15 | 75.99 | 89.13 | 89.13  | 192       |
| 321 | Leicester     | 53  | -1  | 20    |              | 81  | 10  | 757  | 479  | 10  | 1016 | 15603 | 0.43 | 2.15 | 48.36 | 89.32 | 89.32  | 192       |
| 322 | Milton Keynes | 52  | -1  | 20    |              | 86  | 10  | 704  | 479  | 11  | 506  | 24767 | 0.53 | 2.13 | 34.54 | 75.44 | 75.44  | 192       |
| 323 | Cardiff       | 51  | -3  | 20    |              | 30  | 11  | 1108 | 450  | 24  | 444  | 14669 | 0.45 | 0.71 | 99.67 | 59.31 | 59.31  | 192       |
| 324 | Bristol       | 51  | -3  | 20    |              | 52  | 10  | 1095 | 462  | 19  | 506  | 17758 | 0.45 | 0.71 | 66.12 | 93.47 | 93.47  | 192       |
| 325 | Southampton   | 51  | -1  | 20    |              | 23  | 11  | 976  | 458  | 26  | 1016 | 25285 | 0.46 | 1.88 | 39.47 | 81.47 | 81.47  | 192       |
| 326 | Oskemen       | 50  | 83  | 20    | Urban lawn   | 293 | 4   | 549  | 1350 | 21  | 30   | 17881 | 0.45 | 0.31 | 33.06 | 73.40 | 73.40  | 193       |
| 327 | Chelyabinsk   | 55  | 61  | 10    | Urban lawn   | 168 | 7   | 602  | 1246 | 55  | 613  | 6256  | 0.51 | 1.51 | 28.30 | 33.06 | 59.69  | 65        |
| 328 | Dijon         | 47  | 5   | 20    |              | 300 | 11  | 982  | 645  | 16  | 165  | 17041 | 0.42 | 2.56 | 34.90 | 76.78 | 76.78  | 194       |



| ID  | City        | Lat | Lon | Depth | Vegetation   | Ele  | MAT | MAP  | TS   | PS  | PD   | GDPP  | UGI  | UHI   | SOCC  | SOCD  | SOCD20 | Reference |
|-----|-------------|-----|-----|-------|--------------|------|-----|------|------|-----|------|-------|------|-------|-------|-------|--------|-----------|
| 329 | Ulan-Ude    | 52  | 108 | 20    | Urban forest | 219  | 5   | 306  | 1547 | 109 | 195  | 8446  | 0.37 | 4.40  | 42.00 | 84.09 | 84.09  | 195       |
| 330 | Ulan-Ude    | 52  | 108 | 20    | Urban forest | 219  | 5   | 306  | 1547 | 109 | 195  | 8446  | 0.37 | 4.40  | 48.00 | 89.08 | 89.08  | 195       |
| 331 | São Paulo   | -24 | -47 | 20    | Urban forest | 800  | 27  | 598  | 237  | 59  | 4322 | 3906  | 0.37 | 4.44  | 21.20 | 53.21 | 53.21  | 196       |
| 332 | Apatity     | 68  | 33  | 10    | Urban forest | 152  | 0   | 853  | 983  | 35  | 22   | 5593  | 0.44 | 0.51  | 40.82 | 40.00 | 72.22  | 197       |
| 333 | Bratislava  | 48  | 17  | 10    |              | 155  | 11  | 663  | 772  | 25  | 309  | 32758 | 0.48 | -0.01 | 21.90 | 27.29 | 49.28  | 198       |
| 334 | Xiamen      | 25  | 118 | 5     | Urban lawn   | 24   | 22  | 1464 | 598  | 59  | 1855 | 13116 | 0.30 | 3.26  | 30.00 | 17.21 | 58.97  | 199       |
| 335 | Mashhad     | 36  | 60  | 20    |              | 1011 | 14  | 229  | 862  | 80  | 377  | 8090  | 0.17 | -0.59 | 32.50 | 72.61 | 72.61  | 200       |
| 336 | Singapore   | 1   | 104 | 10    | Urban lawn   | 21   | 28  | 2154 | 51   | 23  | 5311 | 52383 | 0.49 | 1.91  | 12.50 | 17.01 | 30.72  | 201       |
| 337 | Bydgoszcz   | 53  | 18  | 20    |              | 48   | 10  | 564  | 746  | 38  | 233  | 10436 | 0.49 | 1.05  | 25.80 | 61.85 | 61.85  | 202       |
| 338 | Teresina    | -5  | -43 | 10    |              | 41   | 26  | 1478 | 115  | 92  | 353  | 590   | 0.36 | 1.34  | 10.90 | 15.05 | 27.18  | 203       |
| 339 | Wroclaw     | 51  | 17  | 20    | Urban lawn   | 193  | 9   | 583  | 731  | 43  | 259  | 10798 | 0.50 | 1.69  | 58.24 | 93.53 | 93.53  | 204       |
| 340 | Manaus      | -3  | -60 | 20    |              | 638  | 26  | 2300 | 53   | 45  | 495  | 15031 | 0.38 | 1.09  | 6.60  | 18.92 | 18.92  | 205       |
| 341 | Lagos       | 7   | 3   | 10    |              | 24   | 28  | 1342 | 122  | 70  | 3423 | 6440  | 0.28 | 2.80  | 10.44 | 14.47 | 26.13  | 206       |
| 342 | Hohhot      | 41  | 112 | 20    |              | 1069 | 7   | 386  | 1253 | 108 | 979  | 9088  | 0.27 | 3.36  | 14.91 | 38.76 | 38.76  | 207       |
| 343 | Hohhot      | 41  | 112 | 20    |              | 1069 | 7   | 386  | 1253 | 108 | 979  | 9088  | 0.27 | 3.36  | 12.99 | 36.12 | 36.12  | 207       |
| 344 | Kunming     | 25  | 103 | 20    |              | 1923 | 15  | 1000 | 476  | 84  | 1079 | 5057  | 0.27 | 2.61  | 9.53  | 26.64 | 26.64  | 208       |
| 345 | Linfen      | 36  | 112 | 20    |              | 450  | 11  | 527  | 1048 | 88  | 581  | 6549  | 0.30 | 2.31  | 6.09  | 17.53 | 17.53  | 209       |
| 346 | Khorramabad | 33  | 48  | 20    |              | 1222 | 15  | 360  | 881  | 87  | 45   | 4782  | 0.18 | 0.86  | 22.88 | 56.47 | 56.47  | 210       |
| 347 | Havana      | 23  | -82 | 20    |              | 53   | 26  | 1341 | 243  | 47  | 1975 | 16130 | 0.43 | 3.26  | 31.86 | 71.67 | 71.67  | 211       |
| 348 | Çanakkale   | 40  | 26  | 5     |              | 23   | 16  | 786  | 695  | 62  | 76   | 10597 | 0.30 | 1.10  | 22.62 | 14.00 | 47.95  | 212       |
| 349 | Jagiroad    | 26  | 92  | 20    |              | 76   | 26  | 1399 | 424  | 91  | 633  | 1119  | 0.40 | 0.71  | 25.60 | 61.50 | 61.50  | 213       |
| 350 | Manchester  | 53  | -2  | 10    | Urban lawn   | 92   | 10  | 1010 | 449  | 19  | 1114 | 16084 | 0.47 | 1.93  | 64.50 | 55.47 | 100.14 | 214       |
| 351 | Shanghai    | 31  | 121 | 20    |              | 4    | 16  | 1208 | 856  | 47  | 7658 | 14363 | 0.35 | 5.02  | 24.94 | 60.32 | 60.32  | 215       |
| 352 | Mexico City | 19  | -99 | 10    | Urban forest | 2316 | 17  | 586  | 182  | 94  | 3532 | 18488 | 0.26 | 7.40  | 26.00 | 22.62 | 40.84  | 216       |
| 353 | New York    | 41  | -74 | 10    |              | 38   | 13  | 1161 | 893  | 10  | 6041 | 36082 | 0.49 | 4.34  | 54.70 | 46.28 | 83.57  | 217       |
| 354 | Madison     | 43  | -89 | 15    | Urban lawn   | 267  | 18  | 1300 | 1077 | 39  | 191  | 30554 | 0.52 | 1.39  | 33.06 | 65.46 | 82.97  | 218       |

| ID  | City                     | Lat | Lon  | Depth | Vegetation   | Ele  | MAT | MAP  | TS   | PS  | PD   | GDPP  | UGI  | UHI   | SOCC  | SOCD  | SOCD20 | Reference |
|-----|--------------------------|-----|------|-------|--------------|------|-----|------|------|-----|------|-------|------|-------|-------|-------|--------|-----------|
| 355 | Pinellas                 | 28  | -83  | 15    |              | 5    | 29  | 1240 | 461  | 55  | 1178 | 38117 | 0.49 | 1.56  | 25.00 | 45.32 | 57.44  | 219       |
| 356 | Santiago de Compostela   | 43  | -9   | 10    |              | 253  | 13  | 1242 | 393  | 46  | 440  | 16767 | 0.48 | 1.66  | 42.70 | 42.38 | 76.52  | 220       |
| 357 | Kumasi                   | 7   | -2   | 15    |              | 258  | 26  | 1250 | 107  | 53  | 1288 | 2935  | 0.35 | 4.92  | 13.28 | 27.89 | 35.35  | 64        |
| 358 | Qingdao                  | 36  | 120  | 10    |              | 30   | 13  | 604  | 977  | 90  | 2471 | 11327 | 0.25 | 3.26  | 34.51 | 37.70 | 68.07  | 221       |
| 359 | Baoding                  | 39  | 115  | 20    |              | 20   | 13  | 500  | 1119 | 129 | 962  | 7857  | 0.35 | 2.24  | 14.13 | 37.90 | 37.90  | 222       |
| 360 | Guiyang                  | 27  | 107  | 20    | Urban forest | 1185 | 15  | 1200 | 681  | 70  | 1195 | 4061  | 0.31 | 1.64  | 30.40 | 69.47 | 69.47  | 223       |
| 361 | Tianshui                 | 35  | 106  | 10    |              | 1213 | 9   | 552  | 880  | 80  | 471  | 9023  | 0.30 | 2.44  | 5.90  | 8.50  | 15.36  | 224       |
| 362 | Wuxi                     | 32  | 120  | 10    | Urban forest | 15   | 17  | 1393 | 906  | 54  | 2726 | 10790 | 0.31 | 4.34  | 19.93 | 28.30 | 51.10  | 225       |
| 363 | Harbin                   | 46  | 127  | 20    | Urban forest | 146  | 4   | 529  | 1486 | 107 | 2495 | 6578  | 0.32 | 3.82  | 27.99 | 78.37 | 78.37  | 226       |
| 364 | Harbin                   | 46  | 127  | 20    | Urban forest | 146  | 4   | 529  | 1486 | 107 | 2495 | 6578  | 0.32 | 3.82  | 19.87 | 54.45 | 54.45  | 227       |
| 365 | Neuchatel                | 47  | 7    | 10    |              | 1192 | 9   | 1456 | 647  | 16  | 334  | 29332 | 0.54 | 2.43  | 52.00 | 31.20 | 56.33  | 228       |
| 366 | Manchester_USA           | 43  | -71  | 20    | Urban lawn   | 83   | 10  | 1132 | 993  | 10  | 483  | 31530 | 0.50 | 2.77  | 30.40 | 58.37 | 58.37  | 229       |
| 367 | Lubbock                  | 34  | -102 | 15    | Urban lawn   | 990  | 17  | 450  | 828  | 58  | 110  | 33476 | 0.35 | -0.07 | 28.16 | 50.69 | 64.24  | 230       |
| 368 | Albuquerque              | 35  | -107 | 15    | Urban lawn   | 1596 | 12  | 354  | 858  | 52  | 335  | 30185 | 0.26 | -0.59 | 19.30 | 37.00 | 46.89  | 231       |
| 369 | Atlanta                  | 34  | -84  | 15    | Urban lawn   | 304  | 17  | 1416 | 748  | 15  | 983  | 32075 | 0.52 | 3.24  | 14.30 | 28.72 | 36.40  | 231       |
| 370 | Cheyenne                 | 41  | -105 | 15    | Urban lawn   | 1852 | 8   | 412  | 849  | 57  | 40   | 35042 | 0.39 | -0.49 | 21.70 | 40.65 | 51.52  | 231       |
| 371 | Dallas                   | 33  | -97  | 15    | Urban lawn   | 182  | 19  | 1023 | 822  | 31  | 1019 | 35747 | 0.43 | -0.34 | 22.90 | 42.39 | 53.73  | 231       |
| 372 | Denver                   | 40  | -105 | 15    | Urban lawn   | 1673 | 10  | 413  | 865  | 43  | 700  | 35796 | 0.43 | 4.96  | 31.70 | 53.58 | 67.91  | 231       |
| 373 | Duluth                   | 47  | -92  | 15    | Urban lawn   | 206  | 5   | 804  | 1141 | 50  | 85   | 33373 | 0.46 | 2.03  | 28.36 | 49.67 | 62.95  | 231       |
| 374 | Houston                  | 30  | -95  | 15    | Urban lawn   | 26   | 21  | 1264 | 640  | 21  | 1154 | 36992 | 0.48 | 1.66  | 21.49 | 40.34 | 51.12  | 231       |
| 375 | Las Vegas                | 36  | -115 | 15    | Urban lawn   | 675  | 19  | 153  | 896  | 44  | 952  | 32418 | 0.19 | 2.06  | 25.09 | 45.44 | 57.59  | 231       |
| 376 | Minneapolis [Saint Paul] | 45  | -93  | 15    | Urban lawn   | 270  | 8   | 843  | 1517 | 51  | 707  | 33597 | 0.56 | 2.03  | 51.68 | 68.45 | 86.76  | 231       |
| 377 | Orlando                  | 29  | -81  | 15    | Urban lawn   | 31   | 23  | 1499 | 454  | 51  | 583  | 37103 | 0.49 | 1.56  | 17.98 | 34.90 | 44.23  | 231       |
| 378 | Phoenix                  | 33  | -112 | 15    | Urban lawn   | 355  | 24  | 194  | 781  | 48  | 386  | 32038 | 0.25 | 0.10  | 21.13 | 39.80 | 50.44  | 231       |
| 379 | Portland                 | 46  | -123 | 15    | Urban lawn   | 70   | 12  | 1162 | 583  | 59  | 551  | 28792 | 0.49 | 4.07  | 21.21 | 39.92 | 50.60  | 231       |
| 380 | San Francisco            | 38  | -122 | 15    | Urban lawn   | 16   | 19  | 928  | 269  | 92  | 1759 | 13778 | 0.31 | 1.94  | 27.69 | 48.83 | 61.89  | 231       |

| ID  | City                     | Lat | Lon  | Depth | Vegetation   | Ele | MAT | MAP  | TS   | PS  | PD   | GDPP  | UGI  | UHI   | SOCC  | SOCD  | SOCD20 | Reference |
|-----|--------------------------|-----|------|-------|--------------|-----|-----|------|------|-----|------|-------|------|-------|-------|-------|--------|-----------|
| 381 | Seattle                  | 47  | -122 | 15    | Urban lawn   | 80  | 12  | 1143 | 520  | 57  | 689  | 32540 | 0.51 | 4.32  | 25.52 | 46.02 | 58.33  | 231       |
| 382 | Wichita                  | 38  | -97  | 15    | Urban lawn   | 408 | 15  | 847  | 1006 | 45  | 219  | 33402 | 0.47 | -0.09 | 21.96 | 41.03 | 52.00  | 231       |
| 383 | Wooster                  | 41  | -82  | 15    | Urban lawn   | 303 | 11  | 1081 | 947  | 21  | 104  | 31553 | 0.53 | 0.90  | 32.02 | 53.93 | 68.35  | 231       |
| 384 | Baltimore                | 39  | -77  | 10    | Urban lawn   | 70  | 13  | 1154 | 897  | 11  | 939  | 32721 | 0.47 | 2.86  | 21.85 | 23.69 | 42.76  | 232       |
| 385 | Boston                   | 42  | -71  | 10    | Urban lawn   | 28  | 11  | 1169 | 926  | 8   | 1094 | 43495 | 0.52 | 2.77  | 23.69 | 20.61 | 37.20  | 232       |
| 386 | Los Angeles              | 34  | -118 | 10    | Urban lawn   | 173 | 18  | 236  | 392  | 100 | 1404 | 39525 | 0.29 | 0.64  | 23.06 | 17.69 | 31.94  | 232       |
| 387 | Miami                    | 26  | -80  | 10    | Urban lawn   | 8   | 25  | 1885 | 328  | 45  | 875  | 38891 | 0.43 | 3.04  | 31.40 | 28.79 | 51.98  | 232       |
| 388 | Minneapolis [Saint Paul] | 45  | -93  | 10    | Urban lawn   | 270 | 8   | 843  | 1517 | 51  | 707  | 33597 | 0.56 | 2.03  | 28.38 | 29.52 | 53.29  | 232       |
| 389 | Phoenix                  | 33  | -112 | 10    | Urban lawn   | 355 | 24  | 194  | 781  | 48  | 386  | 32038 | 0.25 | 0.10  | 10.38 | 11.00 | 19.87  | 232       |
| 390 | Melbourne                | -38 | 145  | 10    | Urban lawn   | 63  | 15  | 647  | 375  | 14  | 964  | 27030 | 0.40 | 1.96  | 34.00 | 41.48 | 74.89  | 233       |
| 391 | Aveiro                   | 40  | -8   | 10    |              | 16  | 18  | 1000 | 438  | 51  | 114  | 12720 | 0.38 | 1.45  | 19.00 | 24.35 | 43.97  | 234       |
| 392 | Ljubljana                | 46  | 15   | 10    |              | 302 | 10  | 1452 | 768  | 25  | 161  | 22088 | 0.47 | 3.94  | 53.00 | 45.95 | 82.95  | 234       |
| 393 | Turin                    | 45  | 8    | 10    |              | 18  | 17  | 598  | 708  | 38  | 781  | 18845 | 0.43 | 4.17  | 21.00 | 26.40 | 47.67  | 234       |
| 394 | Uppsala                  | 60  | 18   | 10    |              | 21  | 7   | 556  | 766  | 29  | 226  | 18817 | 0.46 | 1.94  | 42.00 | 42.05 | 75.91  | 234       |
| 395 | Ljubljana                | 46  | 15   | 20    |              | 302 | 10  | 1452 | 768  | 25  | 161  | 22088 | 0.47 | 3.94  | 43.35 | 85.37 | 85.37  | 235       |
| 396 | Seville                  | 37  | -6   | 20    |              | 173 | 16  | 510  | 556  | 67  | 381  | 22576 | 0.33 | -0.05 | 15.50 | 41.06 | 41.06  | 235       |
| 397 | Turin                    | 45  | 8    | 20    |              | 18  | 17  | 598  | 708  | 38  | 781  | 18845 | 0.43 | 4.17  | 17.60 | 45.72 | 45.72  | 235       |
| 398 | Nanchang                 | 29  | 116  | 20    | Urban forest | 25  | 18  | 1700 | 866  | 60  | 1520 | 6467  | 0.38 | 2.81  | 15.02 | 41.76 | 41.76  | 236       |
| 399 | Vancouver                | 49  | -123 | 15    | Urban forest | 55  | 12  | 1189 | 548  | 52  | 818  | 22688 | 0.43 | 5.78  | 41.24 | 62.50 | 79.22  | 237       |
| 400 | Madrid                   | 40  | -4   | 20    |              | 41  | 18  | 261  | 667  | 40  | 1722 | 20550 | 0.21 | 2.15  | 26.86 | 63.70 | 63.70  | 238       |
| 401 | Los Angeles              | 34  | -118 | 5     | Urban lawn   | 173 | 18  | 236  | 392  | 100 | 1404 | 39525 | 0.29 | 0.64  | 77.14 | 22.08 | 75.63  | 239       |
| 402 | Baltimore                | 39  | -77  | 10    | Urban lawn   | 70  | 13  | 1154 | 897  | 11  | 939  | 32721 | 0.47 | 2.86  | 40.60 | 32.07 | 57.91  | 240       |
| 403 | Puducherry               | 12  | 80   | 20    | Urban forest | 431 | 24  | 1297 | 239  | 99  | 1466 | 467   | 0.39 | -0.45 | 7.50  | 19.50 | 19.50  | 241       |
| 404 | Puducherry               | 12  | 80   | 20    | Urban lawn   | 431 | 24  | 1297 | 239  | 99  | 1466 | 467   | 0.39 | -0.45 | 7.00  | 19.60 | 19.60  | 241       |
| 405 | Tezpur                   | 27  | 93   | 10    | Urban lawn   | 48  | 23  | 2524 | 423  | 90  | 444  | 6648  | 0.44 | 1.71  | 12.60 | 18.27 | 32.99  | 242       |
| 406 | Tezpur                   | 27  | 93   | 10    | Urban forest | 48  | 23  | 2524 | 423  | 90  | 444  | 6648  | 0.44 | 1.71  | 15.60 | 21.37 | 38.59  | 242       |

| ID  | City              | Lat | Lon | Depth | Vegetation   | Ele | MAT | MAP  | TS   | PS  | PD   | GDPP  | UGI  | UHI  | SOCC  | SOCD  | SOCD20 | Reference |
|-----|-------------------|-----|-----|-------|--------------|-----|-----|------|------|-----|------|-------|------|------|-------|-------|--------|-----------|
| 407 | Delhi [New Delhi] | 29  | 77  | 10    | Urban lawn   | 216 | 25  | 1065 | 694  | 135 | 7721 | 2220  | 0.40 | 2.43 | 12.80 | 17.37 | 31.37  | 243       |
| 408 | Shihezi           | 44  | 86  | 10    |              | 400 | 8   | 230  | 1520 | 44  | 241  | 7961  | 0.36 | 1.31 | 15.49 | 20.51 | 37.03  | 244       |
| 409 | Bucharest         | 44  | 26  | 20    |              | 80  | 13  | 691  | 877  | 35  | 1020 | 28720 | 0.40 | 1.74 | 17.40 | 45.28 | 45.28  | 245       |
| 410 | Iassy             | 48  | 27  | 20    |              | 43  | 12  | 555  | 852  | 50  | 59   | 4908  | 0.44 | 2.74 | 18.00 | 46.58 | 46.58  | 245       |
| 411 | Baia Mare         | 48  | 24  | 20    |              | 227 | 8   | 796  | 804  | 28  | 68   | 5257  | 0.40 | 4.27 | 8.80  | 24.75 | 24.75  | 245       |
| 412 | Seoul             | 37  | 127 | 15    | Urban forest | 54  | 12  | 1115 | 998  | 92  | 5060 | 13511 | 0.35 | 1.99 | 8.70  | 19.31 | 24.48  | 246       |
| 413 | Suwon             | 36  | 129 | 15    | Urban forest | 50  | 11  | 1261 | 839  | 66  | 547  | 28777 | 0.27 | 3.52 | 4.79  | 8.84  | 11.20  | 246       |
| 414 | Naples [Italy]    | 41  | 14  | 5     | Urban forest | 5   | 15  | 908  | 605  | 49  | 2830 | 20421 | 0.39 | 2.51 | 77.72 | 21.97 | 75.26  | 247       |
| 415 | Abuja             | 9   | 7   | 10    |              | 436 | 27  | 1125 | 181  | 96  | 704  | 3877  | 0.35 | 0.53 | 7.50  | 10.67 | 19.26  | 248       |
| 416 | Beijing           | 40  | 116 | 20    |              | 51  | 12  | 640  | 1098 | 133 | 6609 | 16241 | 0.33 | 4.90 | 9.59  | 26.47 | 26.47  | 249       |
| 417 | Beijing           | 40  | 116 | 20    |              | 51  | 12  | 640  | 1098 | 133 | 6609 | 16241 | 0.33 | 4.90 | 10.22 | 29.02 | 29.02  | 249       |
| 418 | Beijing           | 40  | 116 | 20    | Urban forest | 51  | 12  | 640  | 1098 | 133 | 6609 | 16241 | 0.33 | 4.90 | 9.57  | 24.50 | 24.50  | 249       |
| 419 | Geneva            | 46  | 6   | 10    | Urban lawn   | 418 | 11  | 985  | 670  | 14  | 558  | 44417 | 0.48 | 4.29 | 45.13 | 49.64 | 89.63  | 250       |
| 420 | Toronto           | 44  | -80 | 5     |              | 157 | 8   | 839  | 975  | 15  | 1154 | 27690 | 0.45 | 5.61 | 60.00 | 23.45 | 80.32  | 251       |

## Supplementary References

1. Fick, S. E. & Hijmans, R. J. WorldClim 2: new 1-km spatial resolution climate surfaces for global land areas. *Int. J. Climatol.* **37**, 4302-4315 (2017).
2. Florczyk, A. J. et al. GHSL data package 2019. Publication Office of the European Union. (2019).
3. Corbane, C. et al. The grey-green divide: multi-temporal analysis of greenness across 10,000 urban centres derived from the Global Human Settlement Layer (GHSL). *International Journal of Digital Earth.* **13**, 101-118 (2018).
4. Center for International Earth Science Information Network - CIESIN - Columbia University. Global urban heat island (UHI) data set, 2013. Palisades, NY: NASA Socioeconomic Data and Applications Center. <https://doi.org/10.7927/H4H70CRF> (2016).
5. Kumm, M., Taka, M. & Guillaume, J. H. A. Gridded global datasets for Gross Domestic Product and Human Development Index over 1990–2015. *Scientific Data.* **5**, 180004 (2018).
6. Center for International Earth Science Information Network - CIESIN - Columbia University. Gridded population of the world, version 4 (GPWv4): Population density, revision 11. Palisades, NY: NASA Socioeconomic Data and Applications Center. <https://doi.org/10.7927/H49C6VHW> (2018).
7. Huang, C. et al. Mapping the maximum extents of urban green spaces in 1039 cities using dense satellite images. *Environmental Research Letters.* **16**, (2021).
8. Baruch, Z. et al. Increased plant species richness associates with greater soil bacterial diversity in urban green spaces. *Environmental Research.* **196**, (2021).
9. Mills, J. G. et al. Revegetation of urban green space rewilds soil microbiotas with implications for human health and urban design. *Restoration Ecology.* **28**, S322-S334 (2020).
10. Kelepertzis, E. & Argyraki, A. Geochemical associations for evaluating the availability of potentially harmful elements in urban soils: Lessons learnt from Athens, Greece. *Applied Geochemistry.* **59**, 63-73 (2015).
11. Michopoulos, P. et al. Biogeochemistry of lead in an urban forest in Athens, Greece. *Biogeochemistry.* **73**, 345-357 (2005).
12. Schwendenmann, L. & Mitchell, N. D. Carbon accumulation by native trees and soils in an urban park, Auckland. *New Zealand Journal of Ecology.* **38**, 213-220 (2014).
13. Weissert, L. F., Salmond, J. A. & Schwendenmann, L. Variability of soil organic carbon stocks and soil CO<sub>2</sub> efflux across urban land use and soil cover types. *Geoderma.* **271**, 80-90 (2016).
14. Madrid, L. et al. Variability in concentrations of potentially toxic elements in urban parks from six European cities. *Journal of Environmental Monitoring.* **8**, 1158-1165 (2006).
15. Sonti, N. F., Hallett, R. A., Griffin, K. L. & Sullivan, J. H. White oak and red maple tree ring analysis reveals enhanced productivity in urban forest patches. *Forest Ecology and Management.* **453**, (2019).

16. Kotze, D. J. et al. Urbanization minimizes the effects of plant traits on soil provisioned ecosystem services across climatic regions. *Global Change Biology*. **27**, 4139-4153 (2021).
17. Pouyat, R. V., Yesilonis, I. D., Russell-Anelli, J. & Neerchal, N. K. Soil chemical and physical properties that differentiate urban land-use and cover types. *Soil Science Society of America Journal*. **71**, 1010-1019 (2007).
18. Pouyat, R. V. et al. A global comparison of surface soil characteristics across five cities: A test of the urban ecosystem convergence hypothesis. *Soil Science*. **180**, 136-145 (2015).
19. Su, Y., Cui, B., Ouyang, Z. & Wang, X. Urban-rural gradients in soil nutrients beneath Chinese pine (*Pinus tabulaeformis* Carr.) are affected by land-use. *Urban Ecosystems*. **25**, 955-966 (2022).
20. Xu, X. et al. Effects of urban forest types and traits on soil organic carbon stock in Beijing. *Forests*. **12**, (2021).
21. Li, J., Dou, X., Hu, Y., Gan, D. & Li, F. Variation in soil organic carbon mineralization under various land cover types in urban areas. *Acta Ecologica Sinica*. **38**, 112-121 (2018).
22. Luo, S., Mao, Q. & Ma, K. Comparison on soil carbon stocks between urban and suburban topsoil in Beijing, China. *Chinese Geographical Science*. **24**, 551-561 (2014).
23. Zhao, D. et al. The influence of different types of urban land use on soil microbial biomass and functional diversity in Beijing, China. *Soil Use and Management*. **29**, 230-239 (2013).
24. Pavlovic, P. et al. Fractionation of potentially toxic elements (PTEs) in urban soils from Salzburg, Thessaloniki and Belgrade: An insight into source identification and human health risk assessment. *International Journal of Environmental Research And Public Health*. **18**, (2021).
25. Marija, P. et al. Evaluation of urban contamination with trace elements in city parks in Serbia using pine (*Pinus nigra* Arnold) needles, bark and urban topsoil. *International Journal of Environmental Research*. **11**, 625-639 (2017).
26. Richter, S., Haase, D., Thestorf, K. & Makki, M. Carbon pools of Berlin, Germany: organic carbon in soils and aboveground in trees. *Urban Forestry & Urban Greening*. **54**, (2020).
27. Schmitt-Harsh, M., Mincey, S. K., Patterson, M., Fischer, B. C. & Evans, T. P. Private residential urban forest structure and carbon storage in a moderate-sized urban area in the Midwest, United States. *Urban Forestry & Urban Greening*. **12**, 454-463 (2013).
28. Lompo, D. J.-P. et al. Gaseous emissions of nitrogen and carbon from urban vegetable gardens in Bobo-Dioulasso, Burkina Faso. *Journal of Plant Nutrition and Soil Science*. **175**, 846-853 (2012).
29. Rao, P., Hutrya, L. R., Raciti, S. M. & Finzi, A. C. Field and remotely sensed measures of soil and vegetation carbon and nitrogen across an urbanization gradient in the Boston metropolitan area. *Urban Ecosystems*. **16**, 593-616 (2013).
30. Raciti, S. M., Hutrya, L. R., Rao, P. & Finzi, A. C. Inconsistent definitions of "urban" result in different conclusions about the size of urban carbon and nitrogen stocks. *Ecological Applications*. **22**, 1015-1035 (2012).
31. Enescu, R. E., Dinca, L., Zup, M., Davidescu, S. & Vasile, D. Assessment of soil physical and chemical properties among urban and peri-urban forests: A case study from metropolitan area of Brasov. *Forests*. **13**, (2022).

32. Gonzalez, M., Gomez, E., Comese, R., Quesada, M. & Conti, M. Influence of organic amendments on soil quality potential indicators in an urban horticultural system. *Bioresource Technology*. **101**, 8897-8901 (2010).
33. Bulbovas, P., Camargo, C. Z. S., Ferreira, M. L. & Domingos, M. Anthropogenic interferences in the nutritional status of tree species growing in urban and peri-urban Atlantic forest remnants. *Urban Forestry & Urban Greening*. **50**, (2020).
34. Ungaro, F. et al. Assessment of joint soil ecosystem services supply in urban green spaces: A case study in Northern Italy. *Urban Forestry & Urban Greening*. **67**, (2022).
35. Zhou, W. et al. Soil fertility evaluation for urban forests and green spaces in Changchun city. *Acta Ecologica Sinica*. **37**, 1211-1220 (2017).
36. Gao, S. et al. Characteristics of soil physicochemical property and its carbon storage in urban forest plantation of Changsha city. *Journal of Central South University of Forestry & Technology*. **30**, 16-22 (2010).
37. Alamgir, M., Islam, M., Hossain, N., Kibria, M. & Rahman, M. Assessment of heavy metal contamination in urban soils of Chittagong city, Bangladesh. *International Journal of Plant & Soil Science*. **7**, 362-372 (2015).
38. Liu, X. et al. The role of land use, construction and road on terrestrial carbon stocks in a newly urbanized area of western Chengdu, China. *Landscape and Urban Planning*. **147**, 88-95 (2016).
39. An, J. et al. Spatial distribution of soil carbon and nitrogen in green lands along an urbanization gradient. *Chinese Journal of Ecology*. **38**, 2780-2787 (2019).
40. Gao, X. et al. Temperature induces soil organic carbon mineralization in urban park green spaces, Chengdu, southwestern China: Effects of planting years and vegetation types. *Urban Forestry & Urban Greening*. **54**, (2020).
41. Wang, H. et al. Soil bacterial diversity is associated with human population density in urban greenspaces. *Environmental Science & Technology*. **52**, 5115-5124 (2018).
42. Feng, H., Zhang, S., Fu, W. & Wang, J. Effects of the age of urban greenbelts on soil physical and chemical properties: A case study of Beibei district of Chongqing. *Journal of Southwest China Normal University. Natural Science Edition*. **37**, 96-104 (2012).
43. Lorenz, K. & Lal, R. in: *Carbon Sequestration in Urban Ecosystems* (eds 139-158 (Springer, 2012).
44. Pradhan, R. et al. Biomass carbon and soil nutrient status in urban green sites at foothills of eastern Himalayas: Implication for carbon management. *Current Research in Environmental Sustainability*. **4**, 100168 (2022).
45. Buil, P. A., Renison, D. & Becerra, A. G. Soil infectivity and arbuscular mycorrhizal fungi communities in four urban green sites in central Argentina. *Urban Forestry & Urban Greening*. **64**, (2021).
46. Raciti, S. M., Groffman, P. M. & Fahey, T. J. Nitrogen retention in urban lawns and forests. *Ecological Applications*. **18**, 1615-1626 (2008).
47. Tan, X., Kan, L., Su, Z., Liu, X. & Zhang, L. The composition and diversity of soil bacterial and fungal communities along an urban-to-rural gradient in south China. *Forests*. **10**, (2019).

48. Nagy, R. C., Lockaby, B. G., Zipperer, W. C. & Marzen, L. J. A comparison of carbon and nitrogen stocks among land uses/covers in coastal Florida. *Urban Ecosystems*. **17**, 255-276 (2014).
49. Li, J., Wang, J., Zeng, W., Guo, L. & Li, X. Vertical distribution characteristics and stock of soil organic carbon in different types of urban green space. *Journal of Anhui Agricultural Sciences*. **39**, 12787-12788+12802 (2011).
50. He, J. et al. Stoichiometric characteristics of soil C,N and P in subtropical forests along an urban-to suburb gradient. *Chinese Journal of Ecology*. **35**, 591-596 (2016).
51. Chen, H. et al. Changes in soil carbon sequestration in *Pinus massoniana* forests along an urban-to-rural gradient of southern China. *Biogeosciences*. **10**, 6609-6616 (2013).
52. Lin, Y., Xu, Q., Xiao, Q., Bisong, D. & Chen, X. Characteristics of soil organic carbon fractions in the evergreen broad-leaved forests in Guangzhou, China *Ecological Science*. **41**, 114-120 (2022).
53. Chen, X. Soil fertility quality assessment for urban green space in Hangzhou city. *Guizhou Agricultural Sciences*. **40**, 148-150 (2012).
54. Xie, G., Zhang, M., Wu, C. & Wang, J. Study on physical and chemical properties of greenbelt surface soil in Hangzhou city. *Acta Agriculturae Jiangxi*. **25**, 57-61 (2013).
55. Xu, H. et al. Variation characteristics of soil organic carbon composition and management index of *Quercus acutissima* forests in urban and suburban areas. *Jiangsu Journal of Agricultural Sciences*. **38**, 369-376 (2022).
56. Lu, C., Kotze, D. J. & Setälä, H. M. Evergreen trees stimulate carbon accumulation in urban soils via high root production and slow litter decomposition. *Science of the Total Environment*. **774**, (2021).
57. Kargar, M., Jutras, P., Clark, O. G., Hendershot, W. H. & Prasher, S. O. Macro-nutrient availability in surface soil of urban tree pits influenced by land use, soil age, and soil organic matter content. *Urban Ecosystems*. **18**, 921-936 (2015).
58. Huang, M. et al. Responses of soil physical and chemical to different functional greenbelts in Hohhot city. *Journal of Inner Mongolia Agricultural University(Natural Science Edition)*. **41**, 10-15 (2020).
59. Gbadegesin, A. & Olabode, M. Soil properties in the metropolitan region of Ibadan, Nigeria: implications for the management of the urban environment of developing countries. *Environmentalist*. **20**, 205-214 (2000).
60. Shen, H. et al. Changes in soil ectomycorrhizal fungi community in Oak forests along the urban-rural gradient. *Forests*. **13**, (2022).
61. An, S. E. & Choonsig, K. Relationships between soil carbon storage and soil properties of urbanparks in Jinju-si, Gyeongsangnam-do. *Korean Journal of Agricultural and Forest Meteorology*. **24**, 115-123 (2022).
62. Beyer, L., Blume, H. P., Elsner, D. C. & Willnow, A. Soil organic matter composition and microbial activity in urban soils. *Science of the Total Environment*. **168**, 267-278 (1995).
63. Nero, B. F., Callo-Concha, D., Anning, A. & Denich, M. Urban green spaces enhance climate change mitigation in cities of the global south: the case of Kumasi, Ghana. In: *Urban Transitions Conference* (2016).



64. Nero, B. F. & Anning, A. K. Variations in soil characteristics among urban green spaces in Kumasi, Ghana. *Environmental Earth Sciences*. **77**, (2018).
65. Stoma, G., Manucharova, N. & Belokopytova, N. Biological activity of microbial communities in soils of some Russian cities. *Eurasian Soil Science*. **53**, 760-771 (2020).
66. Huang, R. et al. Effect of soil quality of urban greenland on growth conditions of different trees. *Journal of Gansu Agricultural University*. **52**, 113-119 (2017).
67. Edmondson, J. L., Davies, Z. G., McCormack, S. A., Gaston, K. J. & Leake, J. R. Land-cover effects on soil organic carbon stocks in a European city. *Science of the Total Environment*. **472**, 444-453 (2014).
68. Van Geel, M. et al. Variation in ectomycorrhizal fungal communities associated with Silver linden (*Tilia tomentosa*) within and across urban areas. *Fems Microbiology Ecology*. **94**, (2018).
69. Beesley, L., Moreno-Jimenez, E., Jenn, P. & Lepp, N. W. Carbon and metal(loid)s in parkland and road verge surface soils in the city of Liverpool, UK. *Agronomy-Basel*. **10**, (2020).
70. Trammell, T. L. E., Tripler, C. E., Carper, S. C. & Carreiro, M. M. Potential nitrogen mineralization responses of urban and rural forest soils to elevated temperature in Louisville, KY. *Urban Ecosystems*. **20**, 77-86 (2017).
71. Trammell, T. L. E., Schneid, B. P. & Carreiro, M. M. Forest soils adjacent to urban interstates: Soil physical and chemical properties, heavy metals, disturbance legacies, and relationships with woody vegetation. *Urban Ecosystems*. **14**, 525-552 (2011).
72. Ziter, C. & Turner, M. G. Current and historical land use influence soil-based ecosystem services in an urban landscape. *Ecological Applications*. **28**, 643-654 (2018).
73. Dennis, M., Beesley, L., Hardman, M. & James, P. Ecosystem (Dis)benefits arising from formal and Informal land-use in Manchester (UK); a case study of urban soil characteristics associated with local green space management. *Agronomy-Basel*. **10**, (2020).
74. Berame, J., ELAZEGUI, E. P., ARENAS, M. C. & OROZCO, J. A. Microclimatic factors and soil characteristics of Arroceros forest park in the city of Manila, Philippines. *Biodiversitas Journal of Biological Diversity*. **22**, (2021).
75. Naylo, A. et al. Trace and major element contents, microbial communities, and enzymatic activities of urban soils of Marrakech city along an anthropization gradient. *Journal of Soils and Sediments*. **19**, 2153-2165 (2019).
76. Beroigui, M. et al. Physicochemical and microbial properties of urban park soils of the cities of Marrakech, Morocco and Torun, Poland: Human health risk assessment of fecal coliforms and trace elements. *Catena*. **194**, (2020).
77. Diaz-Sanz, J., Robert, S. & Keller, C. Parameters influencing run-off on vegetated urban soils: A case study in Marseilles, France. *Geoderma*. **376**, (2020).
78. Han, X.-M. et al. Impacts of reclaimed water irrigation on soil antibiotic resistome in urban parks of Victoria, Australia. *Environmental Pollution*. **211**, 48-57 (2016).
79. Canedoli, C., Ferre, C., Abu El Khair, D., Padoa-Schioppa, E. & Comolli, R. Soil organic carbon stock in different urban land uses: high stock evidence in urban parks. *Urban Ecosystems*. **23**, 159-171 (2020).

80. Vasenev, V. I., Stoorvogel, J. J. & Vasenev, I. I. Urban soil organic carbon and its spatial heterogeneity in comparison with natural and agricultural areas in the Moscow region. *Catena*. **107**, 96-102 (2013).
81. Ivashchenko, K. et al. Microbial C-availability and organic matter decomposition in urban soils of megapolis depend on functional zoning. *Soil & Environment*. **38**, 31-41 (2019).
82. Scharenbroch, B. C., Lloyd, J. E. & Johnson-Maynard, J. L. Distinguishing urban soils with physical, chemical, and biological properties. *Pedobiologia*. **49**, 283-296 (2005).
83. Korneykova, M. V. et al. Urbanization affects soil microbiome profile distribution in the Russian arctic region. *International Journal of Environmental Research And Public Health*. **18**, (2021).
84. Jin, T. et al. Effects of urbanization intensity on glomalin-related soil protein in Nanchang, China: Influencing factors and implications for greenspace soil improvement. *Journal of Environmental Management*. **318**, (2022).
85. Wan, S., Chen, F., Hu, X., Zhang, Y. & Fang, X. Urbanization aggravates imbalances in the active C, N and P pools of terrestrial ecosystems. *Global Ecology and Conservation*. **21**, (2020).
86. Shan, Q., Yu, Y., Yu, J. & Zhang, J. Soil enzyme activities and their indication for fertility of urban forest soil. *Frontiers of Environmental Science & Engineering in China*. **2**, 218-223 (2008).
87. Li, X. et al. Distribution of soil physicochemical properties and microbial biomass in three green lands with different use types in the urban area. *Soils*. **53**, 874-880 (2021).
88. Yang, J., Yu, Y., Chen, Y., Wang, X. & Vasenev, V. I. Content and distribution of organic carbon in urban forest soil in different function areas in Nanjing City, China. *Journal of Nanjing Forestry University. Natural Sciences Edition*. **40**, 22-26 (2016).
89. Zhao, Y.-G., Zhang, G.-L., Zepp, H. & Yang, J.-L. Establishing a spatial grouping base for surface soil properties along urban-rural gradient - A case study in Nanjing, China. *Catena*. **69**, 74-81 (2007).
90. Joyner, J. L. et al. Green infrastructure design influences communities of urban soil bacteria. *Frontiers in Microbiology*. **10**, (2019).
91. Ward, E. B. et al. Positive long-term impacts of restoration on soils in an experimental urban forest. *Ecological Applications*. **31**, (2021).
92. Smith, J., Hallett, R. A., Deeb, M. & Groffman, P. M. Fine-scale soil heterogeneity at an urban site: implications for forest restoration. *Restoration Ecology*. **29**, (2021).
93. Downey, A. E. et al. Soil carbon sequestration in urban afforestation sites in New York City. *Urban Forestry & Urban Greening*. **65**, (2021).
94. Oldfield, E. E. et al. Positive effects of afforestation efforts on the health of urban soils. *Forest Ecology and Management*. **313**, 266-273 (2014).
95. Rosier, C. L., Polson, S. W., D'Amico, V., III, Kan, J. & Trammell, T. L. E. Urbanization pressures alter tree rhizosphere microbiomes. *Scientific Reports*. **11**, (2021).
96. Tang, J. et al. Urban green infrastructure features influence the type and chemical composition of soil dissolved organic matter. *Science of the Total Environment*. **764**, (2021).

97. Foti, L. et al. Topsoil characteristics of forests and lawns along an urban-rural gradient in the Paris region (France). *Soil Use and Management*. **37**, 749-761 (2021).
98. Foti, L. et al. Trace element concentrations along a gradient of urban pressure in forest and lawn soils of the Paris region (France). *Science of the Total Environment*. **598**, 938-948 (2017).
99. Trammell, T. L. E., Pouyat, R. V. & D'Amico, V., III. Heterogeneity in soil chemistry relates to urbanization while soil homogeneity relates to plant invasion in small temperate deciduous forests. *Landscape Ecology*. **37**, 1417-1429 (2022).
100. Zhu, W., Hope, D., Gries, C. & Grimm, N. B. Soil characteristics and the accumulation of inorganic nitrogen in an arid urban ecosystem. *Ecosystems*. **9**, 711-724 (2006).
101. Koerner, B. A. & Klopatek, J. M. Carbon fluxes and nitrogen availability along an urban-rural gradient in a desert landscape. *Urban Ecosystems*. **13**, 1-21 (2010).
102. Guillen-Cruz, G., Rodriguez-Sanchez, A. L., Fernandez-Luqueno, F. & Flores-Renteria, D. Influence of vegetation type on the ecosystem services provided by urban green areas in an arid zone of northern Mexico. *Urban Forestry & Urban Greening*. **62**, (2021).
103. da Silva, R. B., Rosa, J. S., Packer, A. P., Bento, C. B. & de Melo Silva, F. A. A soil quality physical-chemical approach 30 years after land-use change from forest to banana plantation. *Environmental Monitoring and Assessment*. **194**, (2022).
104. Cusack, D. F., Lee, J. K., McCleery, T. L. & LeCroy, C. S. Exotic grasses and nitrate enrichment alter soil carbon cycling along an urban-rural tropical forest gradient. *Global Change Biology*. **21**, 4481-4496 (2015).
105. Paradelo, R., Herbon, C. & Barral, M. T. Composition and chemical properties of the soils of the city of Santiago de Compostela, northwestern Spain. *Journal of Environmental Quality*. **50**, 7-21 (2021).
106. Bae, J. & Ryu, Y. Land use and land cover changes explain spatial and temporal variations of the soil organic carbon stocks in a constructed urban park. *Landscape and Urban Planning*. **136**, 57-67 (2015).
107. Madrid, F., Diaz-Barrientos, E. & Madrid, L. Availability and bio-accessibility of metals in the clay fraction of urban soils of Sevilla. *Environmental Pollution*. **156**, 605-610 (2008).
108. Shi, L., Zheng, L., Mei, X., Yu, L. & Jia, Z. Characteristics of soil organic carbon and total nitrogen under different land use types in Shanghai. *Ying yong sheng tai xue bao = The journal of applied ecology*. **21**, 2279-2287 (2010).
109. Zhang, Q. et al. Soil organic carbon distribution and its relationship with soil physicochemical properties in different forest types of Shanghai City. *Journal of Zhejiang a&f University*. **36**, 1087-1095 (2019).
110. Zhang, Q. et al. Study on changes of soil organic carbon density and influencing factors in urban forest. *Ecologic Science*. **41**, 204-210 (2022).
111. Zhang, W. et al. Diversity patterns and drivers of soil microbial communities in urban and suburban park soils of Shanghai, China. *PeerJ*. **9**, e11231 (2021).
112. Tang, Y., Shi, T., Bu, Y. & Shi, Y. Spatial distribution of soil organic carbon stocks in urban green space with urbanization in Shenyang, China. *Chinese Landscape Architecture*. **35**, 68-73 (2019).

113. Shi, Z. J., Lu, Y., Xu, Z. G. & Fu, S. L. Enzyme activities of urban soils under different land use in the Shenzhen city, China. *Plant Soil and Environment*. **54**, 341-346 (2008).
114. Hu, W. Studies on soil physical-chemical properties and enzymes activities for urban parks and roads green-land in Shenzhen *Master Thesis, Huazhong Agricultural University, Wuhan*. (2008).
115. Stefaner, K. et al. Soil greenhouse gas fluxes from a humid tropical forest and differently managed urban parkland in Singapore. *Science of the Total Environment*. **786**, (2021).
116. Kleine, M. et al. Variation in soil organic carbon stocks in Singapore with forest succession and land management. *Journal of Tropical Ecology*. **38**, 275-284 (2022).
117. Doichinova, V., Zhiyanski, M., Hursthouse, A. & Bech, J. Study on the mobility and bioavailability of PTEs in soils from urban forest parks in Sofia, Bulgaria. *Journal of Geochemical Exploration*. **147**, 222-228 (2014).
118. Rawlins, B. G. et al. Methods for estimating types of soil organic carbon and their application to surveys of UK urban areas. *Soil Use and Management*. **24**, 47-59 (2008).
119. Lorenz, K., Preston, C. M. & Kandeler, E. Soil organic matter in urban soils: Estimation of elemental carbon by thermal oxidation and characterization of organic matter by solid-state C-13 nuclear magnetic resonance (NMR) spectroscopy. *Geoderma*. **130**, 312-323 (2006).
120. Kim, Y. J. & Yoo, G. Suggested key variables for assessment of soil quality in urban roadside tree systems. *Journal of Soils and Sediments*. **21**, 2130-2140 (2021).
121. Horvath, A. et al. A complex soil ecological approach in a sustainable urban environment: soil properties and soil biological quality. *Minerals*. **11**, (2021).
122. Fan, L., Yan, L. & Liu, S. Soil physicochemical property in different urban green lands in Taiyuan. *Journal of Chinese Urban Forestry*. **18**, 30-33 (2020).
123. Zhevelev, H. M., Sarah, P. & Oz, A. The spatial variability and temporal dynamics of soil properties as affected by visitors' pressure in an urban park. *Journal of Environmental Protection*. **4**, 52-64 (2013).
124. Sarah, P. & Zhevelev, H. M. Effect of visitors' pressure on soil and vegetation in several different micro-environments in urban parks in Tel Aviv. *Landscape and Urban Planning*. **83**, 284-293 (2007).
125. Sarah, P., Zhevelev, H. M. & Oz, A. Urban park soil and vegetation: effects of natural and anthropogenic factors. *Pedosphere*. **25**, 392-404 (2015).
126. Matziris, E., Stefanou, S., Papazafeiriou, A. Z., Seilopoulos, D. & Papaioannou, A. Impacts of human activities on soil physical properties of urban green areas: a case study in Thessaloniki city, Greece. *Carpathian Journal of Earth and Environmental Sciences*. **11**, 381-394 (2016).
127. Li, S., Liu, Y. & Cheng, X. Comprehensive evaluation on soil quality in the green land around the central area of Tianjin *Journal of Anhui Agricultural Sciences*. **50**, 61-65+71 (2022).
128. Zhang, C., Li, D., Wei, J., Zhao, L. & Liu, F. Soil respiration and its responses to biotic and abiotic factors in patchy remnant forests and urban green landscapes of Tianjin, China. *Urban Forestry & Urban Greening*. **53**, (2020).

129. Takahashi, T., Amano, Y., Kuchimura, K. & Kobayashi, T. Carbon content of soil in urban parks in Tokyo, Japan. *Landscape and Ecological Engineering*. **4**, 139-142 (2008).
130. Zhang, X., Li, Y. & Wang, P. Analysis of spatial variability of soil organic carbon in Urumqi. *Journal of Arid Land Resources and Environment*. **30**, 117-121 (2016).
131. Rai, P. K., Rai, A. & Singh, S. Change in soil microbial biomass along a rural-urban gradient in Varanasi (UP, India). *Geology, Ecology, and Landscapes*. **2**, 15-21 (2018).
132. Singh, S., Singh, M. K., Kumar, C. M., Soni, P. & Ghoshal, N. Impact of tree plantations on the dynamics of soil aggregates in urban degraded lands in the dry tropics. *Land Degradation & Development*. **32**, 5108-5117 (2021).
133. Upadhyay, S., Singh, R., Verma, P. & Raghubanshi, A. S. Spatio-temporal variability in soil CO<sub>2</sub> efflux and regulatory physicochemical parameters from the tropical urban natural and anthropogenic land use classes. *Journal of Environmental Management*. **295**, (2021).
134. Oktaba, L., Odrobinska, D. & Uzarowicz, L. The impact of different land uses in urban area on humus quality. *Journal of Soils and Sediments*. **18**, 2823-2832 (2018).
135. Oktaba, L., Paziewski, K., Kwasowski, W. & Kondras, M. The effect of urbanization on soil properties and soil organic carbon accumulation in topsoil of Pruszków—a medium-sized city in the Warsaw Metropolitan Area, Poland. *Soil Science Annual*. **65**, 10-17 (2014).
136. Wu, H. et al. Soil carbon pool and physic-chemical properties in urban forest of Wuhu. *Chinese Journal of Soil Science*. **49**, 1015-1023 (2018).
137. Zhang, P. et al. Spatial variation and distribution of soil organic carbon in an urban ecosystem from high-density sampling. *Catena*. **204**, (2021).
138. Zhang, X. et al. Effects of vegetation, terrain and soil layer depth on eight soil chemical properties and soil fertility based on hybrid methods at urban forest scale in a typical loess hilly region of China. *Plos One*. **13**, (2018).
139. Fu, Q. et al. Soil microbial distribution depends on different types of landscape vegetation in temperate urban forest ecosystems. *Frontiers in Ecology and Evolution*. **10**, (2022).
140. Tresch, S. et al. Urban soil quality assessment-A comprehensive case study dataset of urban garden soils. *Frontiers in Environmental Science*. **6**, (2018).
141. Beesley, L. Carbon storage and fluxes in existing and newly created urban soils. *Journal of Environmental Management*. **104**, 158-165 (2012).
142. Wavrek, M. T., Jean-Philippe, S. & McKinney, M. L. Ecological and soil data applied to conservation management of an urban forest. *Forests*. **14**, 487 (2023).
143. Adelana, A. O., Aiyelari, E. A., Oluwatosin, G. A. & Are, K. S. Soil properties that differentiate urban land use types with different surface geology in Southwest Nigeria. *Urban Ecosystems*. **26**, 277-290 (2022).
144. Zhang, Z. Y., Yang, X. D., Simay, Z. & Mohammed, A. Health risk evaluation of heavy metals in green land soils from urban parks in Urumqi, northwest China. *Environmental Science And Pollution Research*. **25**, 4459-4473 (2018).
145. Khan, S., Munir, S., Sajjad, M. & Li, G. Urban park soil contamination by potentially harmful elements and human health risk in Peshawar City, Khyber Pakhtunkhwa, Pakistan. *Journal of Geochemical Exploration*. **165**, 102-110 (2016).

146. Serrani, D. et al. Heavy metal load and effects on biochemical properties in urban soils of a medium-sized city, Ancona, Italy. *Environmental Geochemistry and Health*. **44**, 3425-3449 (2022).
147. Du, J., Yu, M., Cong, Y., Lv, H. & Yuan, Z. Soil organic carbon storage in urban green space and its influencing factors: A case study of the 0–20 cm soil layer in Guangzhou city. *Land*. **11**, 1484 (2022).
148. Boim, A. G. F., Patinha, C., Wragg, J., Cave, M. & Alleoni, L. R. F. Respiratory bioaccessibility and solid phase partitioning of potentially harmful elements in urban environmental matrices. *Science of the Total Environment*. **765**, 142791 (2021).
149. Cusack, D. F. Soil nitrogen levels are linked to decomposition enzyme activities along an urban-remote tropical forest gradient. *Soil Biology and Biochemistry*. **57**, 192-203 (2013).
150. Francos, M., Ubeda, X. & Pereira, P. Impact of bonfires on soil properties in an urban park in Vilnius (Lithuania). *Environmental Research*. **181**, 108895 (2020).
151. Rodrigues, S. et al. The influence of anthropogenic and natural geochemical factors on urban soil quality variability: a comparison between Glasgow, UK and Aveiro, Portugal. *Environmental Chemistry Letters*. **7**, 141-148 (2008).
152. Poepflau, C., Marstorp, H., Thored, K. & Kätterer, T. Effect of grassland cutting frequency on soil carbon storage- a case study on public lawns in three Swedish cities. *Soil*. **2**, 175-184 (2016).
153. Gomez-Brandon, M. et al. Influence of land use on the microbiological properties of urban soils. *Applied Soil Ecology*. **175**, (2022).
154. Schifman, L. A., Prues, A., Gilkey, K. & Shuster, W. D. Realizing the opportunities of black carbon in urban soils: Implications for water quality management with green infrastructure. *Science of the Total Environment*. **644**, 1027-1035 (2018).
155. Teng, Y. et al. Environmental vanadium distribution, mobility and bioaccumulation in different land-use Districts in Panzhihua Region, SW China. *Environmental Monitoring and Assessment*. **176**, 605-620 (2011).
156. Mollashahi, H., Szymura, M., Perera, P. C. D. & Szymura, T. H. The effect of grassland type and proximity to the city center on urban soil and vegetation coverage. *Environmental Monitoring and Assessment*. **195**, 599 (2023).
157. Papa, S., Bartoli, G., Pellegrino, A. & Fioretto, A. Microbial activities and trace element contents in an urban soil. *Environmental Monitoring and Assessment*. **165**, 193-203 (2010).
158. Li, L., Li, S., Ma, X. & Yan, Y. Effects of urban green infrastructure designs on soil bacterial community composition and function. *Ecosystems*. 1-11 (2022).
159. Lopes, M. et al. Soil chemical and physical status in semideciduous Atlantic Forest fragments affected by atmospheric deposition in central-eastern São Paulo State, Brazil. *iForest - Biogeosciences and Forestry*. **8**, 798-808 (2015).
160. Milano, V. et al. Collembolan biodiversity in Mediterranean urban parks: impact of history, urbanization, management and soil characteristics. *Applied Soil Ecology*. **119**, 428-437 (2017).

161. McDermot, C. R., Minocha, R., D'Amico III, V., Long, S. & Trammell, T. L. Red maple (*Acer rubrum* L.) trees demonstrate acclimation to urban conditions in deciduous forests embedded in cities. *PLoS one*. **15**, e0236313 (2020).
162. Ouédraogo, R. A. et al. Short and long-term impact of urban gardening on soil organic carbon fractions in Lixisols (Burkina Faso). *Geoderma*. **362**, 114110 (2020).
163. Peach, M. E., Ogden, L. A., Mora, E. A. & Friedland, A. J. Building houses and managing lawns could limit yard soil carbon for centuries. *Carbon Balance and Management*. **14**, 1-14 (2019).
164. Pižl, V. & Schläghamerský, J. The impact of pedestrian activity on soil annelids in urban greens. *European Journal of Soil Biology*. **43**, S68-S71 (2007).
165. Rojas, J. A., Dhar, A. & Naeth, M. A. Urban green spaces restoration using native forbs, site preparation and soil amendments-A case study. *Land*. **11**, 498 (2022).
166. Silva, L. et al. Assessment of fatty acid as a differentiator of usages of urban soils. *Chemosphere*. **81**, 968-975 (2010).
167. Škrbić, B. D., Buljovčić, M. & Antić, I. Comprehensive assessment of heavy elements and evaluation of potential human health risk in the urban environment: a case study from Novi Sad, Serbia. *Environmental Science and Pollution Research*. **29**, 38551-38566 (2022).
168. Smith, R. M., Williamson, J. C., Pataki, D. E., Ehleringer, J. & Dennison, P. Soil carbon and nitrogen accumulation in residential lawns of the Salt Lake Valley, Utah. *Oecologia*. **187**, 1107-1118 (2018).
169. Sapkota, M., Young, J., Coldren, C., Slaughter, L. & Longing, S. Soil physiochemical properties and carbon sequestration of Urban landscapes in Lubbock, TX, USA. *Urban Forestry & Urban Greening*. **56**, 126847 (2020).
170. Toth, Z., Dombos, M. & Hornung, E. Urban soil quality deteriorates even with low heavy metal levels: An arthropod-based multi-indices approach. *Ecological Applications*. **33**, e2848 (2023).
171. Xu, X., Wang, C., Sun, Z., Hao, Z. & Day, S. How do urban forests with different land use histories influence soil organic carbon? *Urban Forestry & Urban Greening*. **83**, 127918 (2023).
172. Yang, L., Li, Y., Peng, K. & Wu, S. Nutrients and heavy metals in urban soils under different green space types in Anji, China. *Catena*. **115**, 39-46 (2014).
173. Liu, W. et al. Metal-driven bacterial community variation in urban and suburban park soils of Shanghai, China. *European Journal of Soil Biology*. **115**, 103475 (2023).
174. van Delden, L., Rowlings, D. W., Scheer, C., De Rosa, D. & Grace, P. R. Effect of urbanization on soil methane and nitrous oxide fluxes in subtropical Australia. *Global Change Biology*. **24**, 5695-5707 (2018).
175. Delgado-Baquerizo, M. et al. Biogenic factors explain soil carbon in paired urban and natural ecosystems worldwide. *Nature Climate Change*. **13**, 450-455 (2023).
176. Zhao, F. et al. Urbanization-land-use interactions predict antibiotic contamination in soil across urban-rural gradients. *Science of the Total Environment*. **867**, 161493 (2023).
177. Wang, Z. et al. Soil quality in urban forests under different understory management practices. *Land Degradation & Development*. **34**, 899-910 (2022).

178. Wang, S., Zhu, Z., Yang, L., Li, H. & Ge, B. Body size and weight of pill bugs (*Armadillidium vulgare*) vary between urban green space habitats. *Animals*. **13**, 857 (2023).
179. Vento, B., Martínez Carretero, E., Moreno, G. & Duplancic, A. Mineral contents in leaves of *Morus alba* L. (Moraceae) and *Platanus hispanica* Miller (Platanaceae) from the urban forests of central-western area of Argentina. *Botany Letters*. **164**, 183-192 (2017).
180. Qiao, Z. et al. Urbanization and greenspace type as determinants of species and functional composition of collembolan communities. *Geoderma*. **428**, 116175 (2022).
181. Rahmonov, O., Srodek, D., Pytel, S., Makieieva, N. & Kupka, T. Relationships between heavy metal concentrations in Greater Celandine (*Chelidonium majus* L.) tissues and soil in urban parks. *International Journal of Environmental Research and Public Health*. **20**, 3887 (2023).
182. Gao, D. et al. Urbanization imprint on soil bacterial communities in forests and grasslands. *Forests*. **14**, 38 (2022).
183. Kong, L., Shi, Z. & Chu, L. M. Carbon emission and sequestration of urban turfgrass systems in Hong Kong. *Science of the Total Environment*. **473-474**, 132-138 (2014).
184. Yesilonis, I. D., James, B. R., Pouyat, R. V. & Momen, B. Lead forms in urban turfgrass and forest soils as related to organic matter content and pH. *Environmental Monitoring and Assessment*. **146**, 1-17 (2008).
185. Yasin, S. Organic carbon sequestration under selected land use in Padang city, West Sumatra, Indonesia. In: *IOP Conference Series: Earth and Environmental Science*. IOP Publishing (2018).
186. Li, Z. Analysis and evaluation of soil fertility characteristics of urban green space in Tangshan. *Modern Horticulture*. **46**, 56-58 (2023).
187. Si, Z. et al. Fertility quality assessment of urban green space soils in Xuzhou city. *Journal of Nanjing Forestry University (Natural Sciences Edition)*. **37**, 60-64 (2013).
188. Sun, S., Chen, D. & Yin, H. Analysis and evaluation of soil fertility characteristics of green space in Hengshui city. *Modern Rural Science and Technology*. 53-55 (2018).
189. Deng, L., Du, N. & Wang, C. Evaluation of soil fertility quality of green space in Qiqihar city. *Heilongjiang Journal of Animal Science and Veterinary Medical Science*. 171-175 (2017).
190. Abdalla, S. B., Predotova, M., Gebauer, J. & Buerkert, A. Horizontal nutrient flows and balances in irrigated urban gardens of Khartoum, Sudan. *Nutrient Cycling in Agroecosystems*. **92**, 119-132 (2011).
191. Jian, S., Tsai, C., Hseu, Z. & Chen, Z. Baseline concentrations of toxic elements in metropolitan park soils of Taiwan. *Terre. & Aquatic Environ. Toxicol.* **5**, 1-7 (2011).
192. Crispo, M. et al. Heavy metals and metalloids concentrations across UK urban horticultural soils and the factors influencing their bioavailability to food crops. *Environmental Pollution*. **288**, 117960 (2021).
193. Woszczyk, M., Spsychalski, W. & Boluspaeva, L. Trace metal (Cd, Cu, Pb, Zn) fractionation in urban-industrial soils of Ust-Kamenogorsk (Oskemen), Kazakhstan-implications for the assessment of environmental quality. *Environmental Monitoring and Assessment*. **190**, 362 (2018).



194. Christel, A. et al. Urban land uses shape soil microbial abundance and diversity. *Science of the Total Environment*. **883**, 163455 (2023).
195. Vladimirovna Afanasyeva, L. & Ayushievna Ayushina, T. Accumulation of heavy metals and biochemical responses in Siberian larch needles in urban area. *Ecotoxicology*. **28**, 578-588 (2019).
196. Bourotte, C., Forti, M. C., Lucas, Y. & Melfi, A. J. Comparison of Polycyclic Aromatic Hydrocarbon (PAHs) concentrations in urban and natural forest soils in the Atlantic Forest (São Paulo State). *Anais da Academia Brasileira de Ciências*. **81**, (2009).
197. Korneykova, M. et al. Soil microbial community of urban green infrastructures in a polar city. *Urban Ecosystems*. **25**, 1399–1415 (2022).
198. Hiller, E. et al. Trace elements in two particle size fractions of urban soils collected from playgrounds in Bratislava (Slovakia). *Environmental Geochemistry and Health*. **42**, 3925-3947 (2020).
199. Luo, X. S. et al. Incorporating bioaccessibility into human health risk assessments of heavy metals in urban park soils. *Science of the Total Environment*. **424**, 88-96 (2012).
200. Mazhari, S. A., Bajestani, A. R. M., Hatefi, F., Aliabadi, K. & Haghghi, F. Soil geochemistry as a tool for the origin investigation and environmental evaluation of urban parks in Mashhad city, NE of Iran. *Environmental Earth Sciences*. **77**, 492 (2018).
201. Velasco, E., Segovia, E., Choong, A. M. F., Lim, B. K. Y. & Vargas, R. Carbon dioxide dynamics in a residential lawn of a tropical city. *Journal of Environmental Management*. **280**, 111752 (2021).
202. Róžański, S. Ł., Castejón, J. M. P. & McGahan, D. G. Child risk assessment of selected metal(loid)s from urban soils using in vitro UBM procedure. *Ecological Indicators*. **127**, 107726 (2021).
203. Moura, M., Moita, G. & Moita Neto, J. Analysis and assessment of heavy metals in urban surface soils of Teresina, Piauí State, Brazil: A study based on multivariate analysis. *Comunicata Scientiae*. **1**, 120-127 (2010).
204. Bekier, J., Jamroz, E., Walenczak-Bekier, K. & Uściła, M. Soil organic matter composition in urban soils: A study of Wrocław agglomeration, SW Poland. *Sustainability*. **15**, 2277 (2023).
205. Ferreira, M. D. S., Fontes, M. P. F., Pacheco, A. A., Ker, J. C. & Lima, H. N. Health risks of potentially toxic trace elements in urban soils of Manaus city, Amazon, Brazil. *Environmental Geochemistry and Health*. **43**, 3407-3427 (2021).
206. Famuyiwa, A. O., Davidson, C. M., Ande, S. & Oyeyiola, A. O. Potentially toxic elements in urban soils from public-access areas in the rapidly growing megacity of Lagos, Nigeria. *Toxics*. **10**, 154 (2022).
207. Mei, Q. et al. Soil fertility evaluation of green space in the main urban area of Hohhot city. *Journal of Yangtze University (Natural Science Edition)*. **17**, 69-72 (2020).
208. Hu, H., Li, R. & Liu, J. Study on physical and chemical properties of greening soil in Kunming residential area. *Journal of Anhui Agricultural Sciences*. **39**, 2129-2131 (2011).
209. Chai, G. Evaluation on soil quality of Fen river park greenland in Linfen.). Shanxi normal university (2017).

210. Karimizadeh, M. & Payandeh, K. Evaluation of Heavy Metals of Lead, Nickel, Cadmium, Vanadium and Some Chemical Parameters in Surface Soils of the City of Khorramabad. *Iranian Journal of Energy & Environment*. **12**, 131-142 (2021).
211. Sosa, D. et al. Polycyclic aromatic hydrocarbons and polychlorinated biphenyls in urban and semi-urban soils of Havana, Cuba. *Journal of Soils and Sediments*. **19**, 1328-1341 (2018).
212. Parlak, M., Tunçay, T. & Botsou, F. Heavy metals in soil and sand from playgrounds of Çanakkale city (Turkey), and related health risks for children. *Sustainability*. **14**, 1145 (2022).
213. Adhikari, G. & Bhattacharyya, K. G. Correlation of soil organic carbon and nutrients (NPK) to soil mineralogy, texture, aggregation, and land use pattern. *Environmental Monitoring and Assessment*. **187**, 735 (2015).
214. O'Riordan, R., Davies, J., Stevens, C. & Quinton, J. N. The effects of sealing on urban soil carbon and nutrients. *Soil*. **7**, 661-675 (2021).
215. Molla, A., Zhang, W., Zuo, S., Ren, Y. & Han, J. A machine learning and geostatistical hybrid method to improve spatial prediction accuracy of soil potentially toxic elements. *Stochastic Environmental Research and Risk Assessment*. **37**, 681-696 (2022).
216. Saavedra-Romero, L. d. L., Alvarado-Rosales, D., Martínez-Trinidad, T. & Hernández-de la Rosa, P. Physical and chemical properties of the urban soil in the San Juan de Aragon Park, Mexico City. *Revista Terra Latinoamericana*. **38**, 529-540 (2020).
217. Marquez-Bravo, L. G. et al. Concentrations of polycyclic aromatic hydrocarbons in New York City community garden soils: Potential sources and influential factors. *Environmental Toxicology and Chemistry*. **35**, 357-367 (2016).
218. Johnston, M. R., Balster, N. J. & Zhu, J. Impact of residential prairie gardens on the physical properties of urban soil in Madison, Wisconsin. *Journal of Environmental Quality*. **45**, 45-52 (2016).
219. Chahal, M. K., Toor, G. S. & Brown, P. Trace metals and polycyclic aromatic hydrocarbons in an urbanized area of Florida. *Soil and Sediment Contamination: An International Journal*. **19**, 419-435 (2010).
220. Probst, M., Gómez-Brandón, M., Herbón, C., Barral, M. T. & Paradelo, R. Fungal-bacterial associations in urban allotment garden soils. *Applied Soil Ecology*. **188**, 104896 (2023).
221. Sun, P., Li, W. & Guo, S. Effects of the soil characteristics of four different types of green space on plant root activity. *Heilongjiang Agricultural Science*. 45-50 (2016).
222. Di, D. et al. Soil chemical properties and heavy metal contamination in different green space types of main urban area, Baoding city. *Journal of Northeast Forestry University*. **50**, 88-95+110 (2022).
223. Lv, W., Wang, S., Liu, X. & Rong, L. Influence of rainfall on soil respiration in karst urban green space. *Earth and Environment*. **39**, 174-180 (2011).
224. Sun, L. & Yang, J. Analysis of soil nutrient heterogeneity of urban green space in Maiji District of Tianshui City. *Gansu Science and Technology Vertical and Horizontal*. **50**, 17-19 (2021).

225. Zhang, Z., Li, Y., Wang, W., Xu, M. & Pang, Z. Effects of different litter remaining characteristics of typical vegetation communities in urban green spaces on the soil physicochemical properties. *Journal of Forest and Environment*. **41**, 132-139 (2021).
226. Zhang, X., Shi, Y. & Shi, Y. Physical and chemical properties in green space of Harbin City. *Protection Forest Science and Technology*. 25-27 (2015).
227. Zhou, W. et al. Soil fertility and spatial variability of urban green land in Harbin. *Scientia Silvae Sinicae*. **54**, 9-17 (2018).
228. Amossé, J. et al. Patterns of earthworm, enchytraeid and nematode diversity and community structure in urban soils of different ages. *European Journal of Soil Biology*. **73**, 46-58 (2016).
229. Contosta, A. R., Lerman, S. B., Xiao, J. & Varner, R. K. Biogeochemical and socioeconomic drivers of above- and below-ground carbon stocks in urban residential yards of a small city. *Landscape and Urban Planning*. **196**, 103724 (2020).
230. Gautam, P., Young, J. R., Sapkota, M., Longing, S. & Weindorf, D. C. Soil carbon sequestration in bermudagrass golf course fairways in Lubbock, Texas. *Agronomy Journal*. **112**, 148-157 (2020).
231. Selhorst, A. & Lal, R. Net carbon sequestration potential and emissions in home lawn turfgrasses of the United States. *Environmental management*. **51**, 198-208 (2013).
232. Trammell, T. L. et al. Urban soil carbon and nitrogen converge at a continental scale. *Ecological Monographs*. **90**, e01401 (2020).
233. Livesley, S. J. et al. Soil-atmosphere exchange of carbon dioxide, methane and nitrous oxide in urban garden systems: impact of irrigation, fertiliser and mulch. *Urban Ecosystems*. **13**, 273-293 (2010).
234. Cachada, A. et al. The variability of polychlorinated biphenyls levels in urban soils from five European cities. *Environmental Pollution*. **157**, 511-518 (2009).
235. Biasioli, M. et al. Potentially toxic elements contamination in urban soils: a comparison of three European cities. *Journal of Environmental Quality*. **36**, 70-79 (2007).
236. Wang, Q. et al. Spatial change in glomalin-related soil protein and its relationships with soil enzyme activities and microbial community structures during urbanization in Nanchang, China. *Geoderma*. **434**, 116476 (2023).
237. Fausak, L., Watkinson, A. D., Dy, K. & Lavkulich, L. Assessment of metal contamination in soil and vegetation along the Arbutus Greenway in Vancouver, British Columbia. *Plant and Soil*. **464**, 593-604 (2021).
238. Bartkowiak, A., Lemanowicz, J. & Lamparski, R. Assessment of selected heavy metals and enzyme activity in soils within the zone of influence of various tree species. *Scientific Reports*. **10**, 14077 (2020).
239. Hung, W., Hernandez-Cira, M., Jimenez, K., Elston, I. & Jay, J. A. Preliminary assessment of lead concentrations in topsoil of 100 parks in Los Angeles, California. *Applied Geochemistry*. **99**, 13-21 (2018).
240. Martinez, N. G., Bettez, N. D. & Groffman, P. M. Sources of variation in home lawn soil nitrogen dynamics. *Journal of environmental quality*. **43**, 2146-2151 (2014).

241. Sundarapandian, S. et al. Soil organic carbon stocks in different land uses in Pondicherry university campus, Puducherry, India. *Tropical Plant Research*. **3**, 10-17 (2016).
242. Saha, A. & Handique, S. Variation of soil organic carbon in a university campus in temperate North-eastern India. *Environmental Challenges*. **7**, 100493 (2022).
243. Singh, D. P., Gadi, R. & Mandal, T. K. Levels, sources, and toxic potential of polycyclic aromatic hydrocarbons in urban soil of Delhi, India. *Human and Ecological Risk Assessment: An International Journal*. **18**, 393-411 (2012).
244. Yang, H., Xiong, H., Chen, X., Wang, Y. & Zhang, F. Identifying the influence of urbanization on soil organic matter content and pH from soil magnetic characteristics. *Journal of Arid Land*. **7**, 820-830 (2015).
245. Lacatusu, R., Lacatusu, A.-R., Lungu, M. & Breaban, I. Macro-and microelements abundance in some urban soils from Romania. *Carpathian Journal of Earth and Environmental Sciences*. **3**, 75-83 (2008).
246. Hyun, J., Kim, Y. J., Kim, A., Plante, A. F. & Yoo, G. Ecosystem services-based soil quality index tailored to the metropolitan environment for soil assessment and management. *Science of the Total Environment*. **820**, 153301 (2022).
247. Maisto, G., Milano, V. & Santorufo, L. Relationships among site characteristics, taxonomical structure and functional trait distribution of arthropods in forest, urban and agricultural soils of Southern Italy. *Ecological Research*. **32**, 511-521 (2017).
248. Suleiman, R. & Ibrahim, J. Assessment of Soil Physical and Chemical Properties under Vegetable Cultivation in Abuja Metropolitan Area, Nigeria. *Zaria Geographer*. **24**, 89-99 (2017).
249. Mao, Q. et al. Spatial heterogeneity of urban soils: the case of the Beijing metropolitan region, China. *Ecological Processes*. **3**, 11 (2014).
250. Tobias, S., Davies, M., Imhof, C. S., Psomas, A. & Boivin, P. Greening and browning of urban lawns in Geneva (Switzerland) as influenced by soil properties. *Geoderma Regional*. **34**, e00677 (2023).
251. Wiseman, C. L., Zereini, F. & Püttmann, W. Metal and metalloid accumulation in cultivated urban soils: A medium-term study of trends in Toronto, Canada. *Science of the Total Environment*. **538**, 564-572 (2015).
