# Supplementary material for: Global distribution of surface soil organic carbon in urban greenspaces
Source: PubMed Central journal article supplement (PMC11258340; doi:10.1038/s41467-024-44887-y), 2024-01-27
Supplement: 41467_2024_44887_MOESM3_ESM.pdf [file 41467_2024_44887_MOESM3_ESM.pdf]

## Description of Additional Supplementary Files

File Name: Supplementary Data 1

Description: The city-level soil organic carbon density and soil organic carbon stock of urban greenspaces for mid- and large cities (urban population > 0.5 million)

ID: ID of the predicted cities

Lat: Latitude (°)

Lon: Longitude (°)

City: Name of the predicted cities

Country: Country of the predicted cities

Continent: Continent of the predicted cities

USGA: Total urban green space area (km<sup>2</sup>)

SOCD: Predicted soil organic carbon density (0-20 cm) (Mg/ha)

SOCS: Predicted soil organic carbon stock (0-20 cm) (Tg)

File Name: Supplementary Data 2

Description: The national-level soil organic carbon density and soil organic carbon stock of urban greenspaces

ID: ID of the predicted cities

Country: Country

UA: Total urban built-up area (km<sup>2</sup>)

USGA: Total urban green space area (km<sup>2</sup>)

SOCD: Predicted soil organic carbon density (0-20 cm) (Mg/ha)

SOCS: Predicted soil organic carbon stock (0-20 cm) (Tg)

File Name: Supplementary Data 3

Description: The SOC-U dataset

ID: ID of the urban greenspace sites

City: Name of the sampled cities

Country: Country of the sampled cities

Continent: Continent of the sampled cities

Lat: Latitude (°)

Lon: Longitude (°)

Climate: Climate type of the sampled cities

Sampling year: Soil sampling year

Depth: Soil depth (cm)

Landuse: Dominant landuse type of the sampled sites

Dominant vegetation: Dominant vegetation type of the sampled sites

Elevation: Elevation of the sampled cities (m)

MAT: Mean annual temperature (°C)

MAP: Mean annual precipitation (mm)

Temperature seasonality: Temperature seasonality (10-2 °C)

Precipitation seasonality: Precipitation seasonality (%)

PD: Urban population density (people/km<sup>2</sup>)

GDPP: Gross domestic product per capita (USD)  
UGI: Urban greenness index  
UHI: Urban heat island index (°C)  
pH: Soil pH  
Clay: Soil clay fraction (%)  
TN: Soil total nitrogen concentration (g/kg)  
TP: Soil total phosphorus concentration (g/kg)  
BD: Soil bulk density (g/cm<sup>3</sup>)  
SOCC: Soil organic carbon concentration (g/kg)  
SOCD: Soil organic carbon density (Mg/ha)  
SOCD20: Soil organic carbon density (0-20 cm) (Mg/ha)  
Reference: Original literature  
Site number: Number of the sampled sites
